# Supplementary material for: Differential effects of ellagic acid on non-alcoholic fatty liver disease in mice: grouped by urolithin A-producing capacity
Source: Royal Society of Chemistry journal article supplement (doi:10.1039/d5fo00440c), 2025-01-01
Supplement: d5fo00440c1.xlsx [file d5fo00440c1.xlsx]

## Sheet: M vs. C
NO	Name	Formula	Calc. MW	RT [min]	C1	C2	C3	C4	C5	M1	M2	M3	M4	M5	Average(C)	Average(M)	P-value	VIP	FC	LOG2FC
1	Hypoxanthine	C5 H4 N4 O	136.038	1.827	2.4293e+10	2.04443e+10	2.40775e+10	2.43221e+10	2.53237e+10	7.41605e+06	1.60011e+06	1.30035e+07	3.56255e+06	1.29051e+07	2.36921e+10	7.69745e+06	9.41975e-06	1.24491	0.000324895	-11.5877
2	L-(+)-Lactic acid	C3 H6 O3	90.0299	1.952	1.3503e+10	1.04777e+10	1.48142e+10	2.77483e+10	2.15808e+10	5.36328e+07	1.78913e+06	4.00536e+07	1.29625e+06	4.57833e+07	1.76248e+10	2.8511e+07	0.00483892	1.12784	0.00161767	-9.27187
3	Nicotinamide	C6 H6 N2 O	122.048	1.791	1.86103e+10	1.39711e+10	2.54036e+10	2.29206e+10	2.16781e+10	3.60754e+06	1.4043e+07	7.63956e+06	6.61578e+06	1.75292e+07	2.05168e+10	9.88702e+06	0.000479464	1.2089	0.0004819	-11.019
4	L-Isoleucine	C6 H13 N O2	131.094	1.947	2.09338e+10	1.67741e+10	1.52178e+10	2.26749e+10	1.59848e+10	3.26456e+06	2.00196e+06	2.46854e+06	2.38202e+06	3.63512e+06	1.83171e+10	2.75044e+06	0.000239177	1.21456	0.000150157	-12.7012
5	Valine	C5 H11 N O2	117.079	1.702	1.38972e+10	1.72217e+10	1.12777e+10	1.35144e+10	1.31186e+10	7.44242e+06	2.58292e+07	8.27803e+06	2.17921e+06	1.82146e+06	1.38059e+10	9.11006e+06	0.000139004	1.22841	0.000659865	-10.5655
6	L-Norleucine	C6 H13 N O2	131.094	2.349	9.90982e+09	1.23732e+10	7.79863e+09	1.1538e+10	8.3895e+09	9.77488e+06	5.55804e+06	3.04727e+06	6.92064e+06	1.00865e+07	1.00018e+10	7.07747e+06	0.000340831	1.21398	0.000707617	-10.4647
7	Choline	C5 H13 N O	103.1	1.594	9.47707e+09	8.39901e+09	6.71e+09	1.01451e+10	8.32803e+09	1.62543e+07	3.90666e+06	2.3618e+07	9.54329e+06	1.12137e+07	8.61185e+09	1.29072e+07	0.000124537	1.22635	0.00149877	-9.38201
8	Arachidonic acid	C20 H32 O2	304.239	23.048	1.20996e+09	2.83137e+08	1.29768e+09	8.28439e+08	1.22331e+09	1.72889e+06	2.56699e+06	662454	1.06036e+07	1.01808e+06	9.68506e+08	3.31601e+06	0.00706003	1.08695	0.00342384	-8.19017
9	L-Phenylalanine	C9 H11 N O2	165.078	3.267	5.52902e+09	6.57534e+09	5.12209e+09	7.02196e+09	5.39324e+09	1.22208e+06	1.38899e+06	1.78447e+06	901652	1.49753e+06	5.92833e+09	1.35894e+06	8.70467e-05	1.23406	0.000229229	-12.0909
10	Docosahexaenoic Acid	C22 H32 O2	328.239	22.171	7.99587e+08	1.89766e+08	8.31974e+08	6.02871e+08	1.26998e+09	789986	1.31459e+06	298016	4.34688e+06	693097	7.38836e+08	1.48851e+06	0.0136213	1.04355	0.00201467	-8.95524
11	Xanthine	C5 H4 N4 O2	152.032	1.838	4.16097e+09	2.72203e+09	2.99871e+09	4.28554e+09	4.72276e+09	2.90179e+06	2.15229e+06	925067	2.34173e+06	1.78713e+06	3.778e+09	2.0216e+06	0.000627633	1.20261	0.000535098	-10.8679
12	DL-Tryptophan	C11 H12 N2 O2	204.089	5.891	3.03557e+09	4.59893e+09	3.63474e+09	3.68716e+09	3.42335e+09	753443	617069	1.80447e+06	824592	1.21263e+06	3.67595e+09	1.04244e+06	0.000140327	1.23243	0.000283584	-11.7839
13	Taurine	C2 H7 N O3 S	125.013	1.621	2.77999e+09	2.35056e+09	1.9562e+09	2.73637e+09	4.25005e+09	553918	78762	1.3788e+06	177487	497890	2.81463e+09	537371	0.0019296	1.17478	0.00019092	-12.3547
14	D-(+)-Proline	C5 H9 N O2	83.037	1.646	3.35037e+09	4.03284e+09	2.39914e+09	3.26343e+09	3.03105e+09	3.66344e+07	3.12337e+07	3.52443e+07	3.37987e+07	3.61395e+07	3.21536e+09	3.46101e+07	0.000270209	1.21841	0.010764	-6.53764
15	L-(-)-Methionine	C5 H11 N O2 S	149.05	2.011	2.8271e+09	3.56987e+09	2.34733e+09	3.08429e+09	2.55132e+09	231808	230419	238584	242666	273710	2.87598e+09	243437	0.00017596	1.2251	8.46449e-05	-13.5282
16	L-Tyrosine	C9 H11 N O3	181.073	2.075	2.13011e+09	2.61186e+09	1.70398e+09	5.89094e+08	2.01054e+09	351373	1.01422e+06	444948	285849	302290	1.80912e+09	479736	0.00589389	1.10496	0.000265177	-11.8808
17	Linoleic acid	C18 H32 O2	280.239	23.791	2.12927e+08	5.76793e+07	2.94339e+08	2.15725e+08	4.15502e+08	205064	363484	220205	1.58294e+06	254375	2.39234e+08	525214	0.0150431	1.03829	0.00219539	-8.8313
18	DL-Carnitine	C7 H15 N O3	161.105	1.621	2.2578e+09	2.13119e+09	1.97264e+09	2.35514e+09	2.09451e+09	1.87438e+06	368846	6.15693e+06	814314	1.39424e+06	2.16226e+09	2.12174e+06	5.25997e-06	1.24524	0.000981264	-9.99307
19	Palmitoylcarnitine	C23 H45 N O4	399.333	15.402	4.60179e+08	2.00514e+08	1.38013e+08	3.94264e+08	5.84536e+08	294162	276249	2.49057e+06	687766	194496	3.55501e+08	788649	0.0126673	1.04819	0.00221841	-8.81626
20	Cholic acid	C24 H40 O5	408.287	9.4	1.53753e+08	3.19693e+08	1.07574e+08	2.49525e+08	3.03823e+08	127621	103465	191556	118783	143017	2.26874e+08	136889	0.00551001	1.12798	0.000603368	-10.6947
21	Oleic acid	C18 H34 O2	282.255	26.943	7.48353e+07	1.1363e+07	5.35923e+07	6.54232e+07	1.12908e+08	283236	791962	1.41022e+06	1.98519e+06	266803	6.36243e+07	947482	0.018794	1.00978	0.0148918	-6.06934
22	L-Ergothioneine	C9 H15 N3 O2 S	229.087	1.672	1.43747e+09	1.18466e+09	1.24662e+09	1.56164e+09	1.59669e+09	181411	175116	372432	221421	180283	1.40542e+09	226132	6.95203e-05	1.23603	0.000160901	-12.6015
23	4-Phenolsulfonic acid	C6 H6 O4 S	173.997	6.244	1.01424e+09	1.04489e+09	1.33798e+09	1.20999e+09	1.31326e+09	4.89592e+08	6.84499e+08	5.15384e+08	5.38423e+08	5.49255e+08	1.18407e+09	5.5543e+08	0.000166057	1.19477	0.469086	-1.09208
24	Galactonic acid	C6 H12 O7	196.057	1.631	1.00752e+09	9.41023e+08	7.42018e+08	9.04127e+08	1.24693e+09	58302.9	92162.2	112553	82530.7	94373.8	9.68323e+08	87984.5	0.000297691	1.22132	9.08628e-05	-13.426
25	4-Oxoproline	C5 H7 N O3	129.041	1.936	8.82479e+08	1.17671e+09	4.82448e+08	8.06138e+08	7.37342e+08	1.92755e+06	1.20414e+06	1.13774e+06	1.27984e+06	1.79602e+06	8.17023e+08	1.46906e+06	0.00190697	1.16586	0.00179806	-9.11934
26	β-Alanine	C3 H7 N O2	89.0479	1.62	1.17518e+09	7.77214e+08	6.68632e+08	9.3708e+08	6.5779e+08	2.18468e+06	1.16769e+06	392976	1.2342e+06	1.8984e+06	8.43179e+08	1.37559e+06	0.0009707	1.17578	0.00163143	-9.25964
27	2-Amino-1,3,4-octadecanetriol	C18 H39 N O3	317.291	10.318	3.06916e+08	1.34591e+08	5.58476e+08	3.15163e+08	4.66581e+08	2.81432e+07	2.12617e+07	2.15379e+07	2.61282e+07	2.47197e+07	3.56345e+08	2.43582e+07	0.0103817	1.06663	0.0683555	-3.8708
28	Creatine	C4 H9 N3 O2	131.069	1.634	9.00273e+08	1.06178e+09	1.12555e+09	9.29994e+08	8.05663e+08	2.85018e+06	855029	2.70763e+06	773911	1.37501e+06	9.64651e+08	1.71235e+06	7.40462e-05	1.23274	0.0017751	-9.13788
29	D-Sphingosine	C18 H37 N O2	299.281	12.535	1.75005e+08	3.8544e+07	1.09754e+08	2.18323e+08	1.28267e+08	816220	700568	781891	984671	273103	1.33979e+08	711291	0.0118844	1.04129	0.00530899	-7.55735
30	2-(acetylamino)-4-(methylthio)butanoic acid	C7 H13 N O3 S	191.061	5.93	8.46695e+08	5.11576e+08	6.01891e+08	9.60381e+08	6.48245e+08	472801	420659	375047	417232	381259	7.13758e+08	413400	0.000984765	1.1823	0.000579188	-10.7537
31	Palmitoyl ethanolamide	C18 H37 N O2	299.281	20.414	4.08116e+08	1.1372e+08	2.53029e+08	4.70253e+08	4.09309e+08	222545	265249	1.02881e+06	743025	251915	3.30885e+08	502308	0.00710534	1.08928	0.00151807	-9.36354
32	DL-β-Leucine	C6 H13 N O2	131.093	2.021	7.87121e+08	5.02075e+08	3.67162e+08	8.82841e+08	6.87856e+08	93198.4	506431	96220.5	96742.1	800377	6.45411e+08	318594	0.00234846	1.15337	0.000493629	-10.9843
33	Thiamine	C12 H16 N4 O S	264.103	1.639	3.07588e+08	3.44711e+08	3.81802e+08	2.72915e+08	4.20586e+08	8.58179e+06	804088	4.94009e+06	3.121e+06	2.24638e+07	3.4552e+08	7.98216e+06	0.000167702	1.22816	0.0231018	-5.43585
34	DL-Glutamine	C5 H10 N2 O3	146.069	1.619	5.19499e+08	4.05835e+08	5.87867e+08	6.73545e+08	6.51038e+08	1.13651e+06	1.48263e+06	3.36287e+06	1.74966e+06	989498	5.67557e+08	1.74424e+06	0.000308847	1.21973	0.00307323	-8.34603
35	?-Muricholic Acid	C24 H40 O5	454.292	8.942	1.40653e+08	3.57714e+08	1.13506e+08	1.30518e+08	1.27846e+08	33081.6	26507.7	34686.1	28576.4	28269.7	1.74047e+08	30224.3	0.019553	1.00694	0.000173656	-12.4915
36	L-Histidine	C6 H9 N3 O2	155.069	1.467	5.20257e+08	5.08542e+08	3.59927e+08	4.84242e+08	5.00666e+08	1.15698e+06	957143	564865	410831	457410	4.74727e+08	709445	8.52674e-05	1.23225	0.00149443	-9.38619
37	11,12-Epoxy-(5Z,8Z,11Z)-icosatrienoic acid	C20 H32 O3	320.234	15.713	2.34394e+07	6.8936e+06	2.69774e+07	1.57362e+07	1.68054e+07	38965.8	38269.2	225338	102835	39668.3	1.79704e+07	89015.1	0.00669052	1.08412	0.00495343	-7.65736
38	trans-3-Indoleacrylic acid	C11 H9 N O2	187.063	2.052	8.51416e+06	7.58844e+06	8.1114e+06	9.62779e+06	8.92675e+06	228009	292668	286359	244523	392975	8.55371e+06	288907	1.68569e-05	1.24324	0.0337756	-4.88788
39	L-Glutamic acid	C5 H9 N O4	147.053	1.628	3.7489e+08	3.99793e+08	3.53147e+08	4.07794e+08	3.9854e+08	1.01567e+06	1.66662e+06	1.42483e+06	1.8944e+06	967725	3.86833e+08	1.39385e+06	2.74901e-06	1.24997	0.00360323	-8.11649
40	Acetyl-L-carnitine	C9 H17 N O4	203.115	1.816	3.53005e+08	4.56398e+08	1.54302e+08	3.1914e+08	3.38424e+08	114459	98485	134371	106127	118396	3.24254e+08	114368	0.0026428	1.15388	0.00035271	-11.4692
41	8Z,11Z,14Z-Eicosatrienoic acid	C20 H34 O2	306.255	24.866	1.12026e+07	2.83434e+06	1.89487e+07	1.03305e+07	1.65592e+07	36638.9	30687.9	30572.9	190456	20341.9	1.19751e+07	61739.5	0.0130612	1.04444	0.00515567	-7.59963
42	Stearoyl ethanolamide	C20 H41 N O2	327.312	25.428	9.48394e+07	3.97718e+07	1.27708e+08	1.28135e+08	2.37139e+08	138844	129178	244955	267386	202650	1.25519e+08	196603	0.0176996	1.02784	0.00156632	-9.3184
43	Urocanic acid	C6 H6 N2 O2	138.042	1.929	3.61755e+08	3.87548e+08	1.70195e+08	3.16967e+08	2.46524e+08	920533	2.96067e+06	5.56992e+06	3.78462e+06	1.19955e+07	2.96598e+08	5.04624e+06	0.00179491	1.16205	0.0170138	-5.87715
44	Propionylcarnitine	C10 H19 N O4	217.131	2.509	1.4959e+08	3.73714e+08	9.86207e+07	1.94781e+08	2.16137e+08	712220	320105	266821	275589	248167	2.06569e+08	364580	0.0113021	1.06812	0.00176493	-9.14617
45	L-Glutathione oxidized	C20 H32 N6 O12 S2	612.15	1.701	2.74667e+08	1.07559e+08	1.97458e+08	2.12439e+08	1.49199e+08	261212	251902	277296	248490	256961	1.88264e+08	259172	0.00271353	1.13297	0.00137664	-9.50463
46	Stearamide	C18 H37 N O	283.286	25.069	1.68879e+07	7.28012e+06	3.91524e+07	1.85064e+07	3.40172e+07	139499	106922	172781	99898.7	152019	2.31688e+07	134224	0.0170915	1.02377	0.00579331	-7.4314
47	Docosapentaenoic acid	C22 H34 O2	330.255	23.506	2.32988e+07	4.61527e+06	2.72267e+07	1.72258e+07	3.1911e+07	89003.4	75748.6	163587	274469	107250	2.08555e+07	142012	0.0118012	1.0525	0.0068093	-7.19828
48	Arachidonic acid ethyl ester	C22 H36 O2	338.281	17.225	2.1517e+07	1.17435e+07	4.08692e+07	3.24883e+07	2.17964e+07	2.66377e+06	1.23731e+06	1.85183e+06	3.9063e+06	3.25279e+06	2.56829e+07	2.5824e+06	0.00974439	1.06193	0.10055	-3.31402
49	DL-Stachydrine	C7 H13 N O2	143.094	1.667	1.49921e+08	1.88827e+08	1.97942e+08	3.0006e+08	2.66486e+08	826439	707540	1.01718e+06	727126	906316	2.20647e+08	836920	0.00129713	1.1928	0.00379302	-8.04244
50	Pipecolic acid	C6 H11 N O2	129.078	1.465	1.87218e+08	2.79355e+08	1.45788e+08	2.27265e+08	1.60138e+08	1.57283e+06	156250	1.51185e+06	1.32421e+06	1.64078e+06	1.99953e+08	1.24118e+06	0.0012015	1.18441	0.00620739	-7.3318
51	Bis(4-ethylbenzylidene)sorbitol	C24 H30 O6	414.202	11.265	2.85549e+07	1.01511e+07	5.26298e+07	3.44369e+07	4.49931e+07	77920.9	75145.4	255114	130120	78790.9	3.41532e+07	123418	0.00958693	1.07386	0.00361367	-8.11232
52	Linoleoyl Ethanolamide	C20 H37 N O2	323.281	17.882	2.65211e+07	7.73878e+06	4.33898e+07	2.23419e+07	4.59971e+07	67444	71030.9	319331	176090	57601	2.91977e+07	138299	0.0146925	1.037	0.00473665	-7.72192
53	Uracil	C4 H4 N2 O2	112.027	1.856	1.26397e+08	6.22825e+07	9.53071e+07	8.21094e+07	1.39326e+08	386151	682247	880624	1.09695e+06	200924	1.01085e+08	649380	0.00207712	1.16035	0.00642413	-7.28228
54	Palmitic acid	C16 H32 O2	256.239	26.682	4.09368e+07	8.60382e+06	3.01583e+07	5.72126e+07	5.06158e+07	147444	227904	185654	346502	162987	3.75054e+07	214098	0.0120364	1.05096	0.00570845	-7.45268
55	2-Fluoro-6-(4-methoxyphenoxy)benzonitrile	C14 H10 F N O2	243.071	1.646	1.82703e+08	1.23315e+08	1.99415e+08	2.35306e+08	1.46276e+08	36556.9	37271.6	39610.1	34339.6	36899.6	1.77403e+08	36935.5	0.000842199	1.18848	0.000208201	-12.2297
56	4-Acetamidobenzoic acid	C9 H9 N O3	179.057	6.552	1.45063e+07	3.1591e+07	2.96952e+07	2.68687e+07	2.13845e+07	149763	219496	261881	184824	204339	2.48091e+07	204061	0.00136102	1.18844	0.00822522	-6.92573
57	Hexadecanamide	C16 H33 N O	255.255	22.576	4.83614e+07	1.12428e+07	2.74421e+07	3.36202e+07	3.11898e+07	900879	778037	848157	964436	417329	3.03713e+07	781768	0.00765298	1.07041	0.0257404	-5.27982
58	NP-008309	C11 H13 N O3	207.088	7.167	1.80414e+08	1.35775e+08	9.75449e+07	1.41475e+08	1.66255e+08	151152	101381	161653	90911.7	93310.8	1.44293e+08	119681	0.000535043	1.20188	0.000829435	-10.2356
59	Deoxycholic acid	C24 H40 O4	392.292	10.436	3.69928e+07	2.80792e+07	2.55624e+07	4.34039e+07	3.84077e+07	69176.2	71456.9	65638.4	74132.9	73579.2	3.44892e+07	70796.7	0.000494869	1.20729	0.00205272	-8.92825
60	18-HETE	C20 H32 O3	302.223	15.712	7.15566e+06	2.49589e+06	6.83704e+06	4.24752e+06	4.36766e+06	45906.8	61089.2	153286	80030.6	46767.2	5.02075e+06	77416	0.00479255	1.10245	0.0154192	-6.01913
61	4-{[5-(7-hydroxy-5,5,8a-trimethyl-2-methylidene-decahydronaphthalen-1-yl)-3-methylpentyl]oxy}-4-oxobutanoic acid	C24 H40 O5	430.268	9.401	2.21018e+07	9.44444e+06	1.61162e+07	2.74894e+07	3.81516e+07	207265	77286.7	222882	168411	83044.1	2.26607e+07	151778	0.0101104	1.07508	0.00669785	-7.22209
62	Chenodeoxycholic Acid	C24 H40 O4	438.297	10.426	2.81168e+07	2.05586e+07	1.83658e+07	2.85447e+07	3.03558e+07	37117.1	38340.8	35218.9	40913.1	39479.6	2.51884e+07	38213.9	0.000463409	1.20899	0.00151713	-9.36444
63	Cortisol	C21 H30 O5	362.208	8.441	3.24033e+07	4.64753e+07	4.51318e+07	1.13062e+08	1.07114e+08	65946	62814.3	63571.2	68406.5	68604.2	6.88374e+07	65868.4	0.0156714	1.04562	0.00095687	-10.0294
64	2-Aminooctanedioic acid	C8 H15 N O4	189.099	6.277	9.43163e+07	9.58972e+07	7.26054e+07	1.11166e+08	7.89343e+07	382793	293940	255272	349852	386937	9.05838e+07	333759	0.000186203	1.22176	0.00368453	-8.0843
65	Glycyl-L-leucine	C8 H16 N2 O3	188.115	3.843	9.6986e+07	6.98626e+07	1.08894e+08	1.08583e+08	7.99724e+07	165672	310678	205537	166854	169524	9.28596e+07	203653	0.000287333	1.21201	0.00219313	-8.83279
66	δ-Valerolactam	C5 H9 N O	99.0684	2.002	5.50482e+06	5.06863e+06	5.05855e+06	7.78633e+06	7.3235e+06	1.61961e+06	1.66877e+06	162410	1.50513e+06	1.84086e+06	6.14837e+06	1.35936e+06	0.000340249	1.17357	0.221092	-2.17728
67	6-keto Prostaglandin F1?	C20 H34 O6	352.223	7.971	7.31126e+07	4.64355e+07	2.23182e+07	5.68767e+07	5.09761e+07	156870	105039	112764	111981	115260	4.99438e+07	120383	0.00379168	1.12328	0.00241037	-8.69653
68	3-Indoxyl sulphate	C8 H7 N O4 S	213.008	6.595	3.34874e+07	2.2074e+07	6.94123e+07	4.48008e+07	5.54923e+07	33008.4	34171.9	31240.8	35351.3	35537.5	4.50533e+07	33862	0.00550296	1.11683	0.000751597	-10.3778
69	2-(2-amino-3-methylbutanamido)-3-phenylpropanoic acid	C14 H20 N2 O3	264.146	6.366	3.47865e+07	4.80905e+07	7.39995e+07	8.21286e+07	5.67588e+07	459254	463510	575113	512825	607050	5.91528e+07	523551	0.00239228	1.1653	0.00885082	-6.81997
70	Oleoyl ethanolamide	C20 H39 N O2	325.296	21.082	9.66565e+06	2.06754e+06	1.09675e+07	7.77779e+06	1.39193e+07	219235	69702.9	816146	217764	67450.1	8.87956e+06	278060	0.0119441	1.05123	0.0313146	-4.99702
71	Taurodeoxycholic Acid (sodium salt)	C26 H45 N O6 S	521.276	9.198	2.77313e+07	7.70327e+07	5.01753e+07	4.7289e+07	2.61759e+07	40878.5	43448.1	50080.7	43382.2	42911.2	4.56808e+07	44140.2	0.00782865	1.09166	0.000966274	-10.0153
72	Hexanoylcarnitine	C13 H25 N O4	259.177	7.093	5.14906e+07	1.60441e+07	4.89149e+07	7.02438e+07	4.20445e+07	70199.5	97875.3	116689	132114	88990.4	4.57476e+07	101174	0.00650082	1.09243	0.00221156	-8.82072
73	L(+)-Ornithine	C5 H12 N2 O2	132.09	1.459	3.49797e+07	6.71273e+07	2.95875e+07	4.44996e+07	3.25052e+07	367424	416871	333144	346399	393311	4.17399e+07	371430	0.00373432	1.13857	0.00889868	-6.81219
74	Taurochenodeoxycholic acid	C26 H45 N O6 S	521.276	8.943	1.23132e+07	3.49e+07	1.70371e+07	2.51937e+07	2.12275e+07	75198.9	74152.8	73023.2	76293.1	68731.3	2.21343e+07	73479.9	0.00456855	1.13675	0.00331973	-8.23472
75	3-tert-Butyladipic acid	C10 H18 O4	202.119	8.117	4.61328e+07	2.92765e+07	3.11619e+07	3.25309e+07	3.94912e+07	907319	827718	900661	903693	1.10753e+06	3.57186e+07	929384	0.000369008	1.20594	0.0260196	-5.26426
76	Azelaic acid	C9 H16 O4	188.103	7.57	4.95971e+07	1.84411e+07	2.95773e+07	3.20547e+07	3.1189e+07	7.02532e+06	6.53539e+06	6.2173e+06	6.54106e+06	6.15888e+06	3.21718e+07	6.49559e+06	0.00678749	1.07642	0.201903	-2.30827
77	Anandamide (AEA)	C22 H37 N O2	347.281	17.856	4.65483e+06	1.69096e+06	3.05349e+06	3.9007e+06	6.72994e+06	63296.9	66663.2	79867.6	53146.5	55744.3	4.00598e+06	63743.7	0.00936263	1.07656	0.0159121	-5.97373
78	Palmitoleic acid	C16 H30 O2	254.224	23.16	1.98214e+06	551780	2.45859e+06	2.4275e+06	3.78817e+06	47722.2	48616.8	68646	64900.7	40823	2.24164e+06	54141.7	0.0135688	1.04869	0.0241528	-5.37167
79	N-Acetylvaline	C7 H13 N O3	159.088	6.799	4.03717e+07	1.62922e+07	3.8045e+07	5.04669e+07	3.31133e+07	683461	51634.1	635369	679419	744514	3.56578e+07	558879	0.00331323	1.13329	0.0156734	-5.99554
80	Cetrimonium	C19 H41 N	283.323	15.812	1.12886e+07	7.33867e+06	1.0489e+07	1.63919e+07	1.0626e+07	2.31782e+06	2.84122e+06	3.4246e+06	2.97645e+06	2.51902e+06	1.12268e+07	2.81582e+06	0.00420389	1.11872	0.250812	-1.99532
81	Thymidine 5'-monophosphate	C10 H15 N2 O8 P	322.05	7.683	3.09236e+07	9.33197e+06	2.31973e+07	2.79985e+07	3.84617e+07	31641.3	31527.8	29847.9	34100	32033.6	2.59826e+07	31830.1	0.00585507	1.10705	0.00122506	-9.67294
82	Hexadecanedioic acid	C16 H30 O4	286.214	12.998	1.35208e+07	1.07021e+07	1.17684e+07	1.04236e+07	1.06449e+07	63243.6	36532.7	33442.3	42045.2	40128.4	1.1412e+07	43078.4	3.89131e-05	1.23173	0.00377485	-8.04936
83	Linolenic acid ethyl ester	C20 H34 O2	312.265	14.543	1.74401e+07	3.86732e+06	1.57774e+07	1.44865e+07	1.41962e+07	81453.7	65638.3	131085	167665	109512	1.31535e+07	111071	0.00548947	1.10003	0.00844421	-6.88782
84	14(S)-HDHA	C22 H32 O3	344.234	15.29	1.99954e+06	437279	2.39462e+06	2.59319e+06	1.42675e+06	39217.4	38426.8	36482.3	37452.7	38583.6	1.77028e+06	38032.6	0.0111439	1.04672	0.021484	-5.54059
85	Myristyl sulfate	C14 H30 O4 S	294.186	18.881	8.02059e+06	8.2166e+06	1.17014e+07	7.44882e+06	6.98459e+06	310289	411062	1.1925e+06	1.47009e+06	286489	8.4744e+06	734086	0.000410205	1.18849	0.0866239	-3.52909
86	(±)12(13)-DiHOME	C18 H34 O4	314.245	11.839	1.03262e+07	4.07278e+06	1.44274e+07	8.92891e+06	1.34082e+07	922602	754369	822397	1.02399e+06	937516	1.02327e+07	892176	0.00701182	1.09425	0.0871887	-3.51971
87	Tetradecanedioic acid	C14 H26 O4	258.182	11.062	1.925e+07	1.51086e+07	1.23391e+07	1.45272e+07	1.59361e+07	104818	73364	99014.2	125249	92757.9	1.54322e+07	99040.6	0.000167809	1.21945	0.0064178	-7.28371
88	PPG n4	C12 H26 O5	250.177	6.986	1.90897e+07	1.25242e+07	3.41809e+07	2.90462e+07	3.02867e+07	348249	180275	294312	291287	308514	2.50255e+07	284527	0.00345502	1.14455	0.0113695	-6.45869
89	(±)19(20)-DiHDPA	C22 H34 O4	362.245	12.265	6.42328e+06	2.62457e+06	1.08318e+07	5.90501e+06	7.55727e+06	71130.7	75692.6	74319.9	66186.5	69073.5	6.66839e+06	71280.6	0.00760566	1.08616	0.0106893	-6.54768
90	Ethyl violet	C31 H41 N3	455.323	10.325	1.69562e+07	8.72271e+06	1.65718e+07	1.91161e+07	3.16251e+07	42724.5	41466	43705.2	42792.4	42469.7	1.85984e+07	42631.6	0.0074349	1.10098	0.00229222	-8.76904
91	16-Hydroxyhexadecanoic acid	C16 H32 O3	272.234	21.85	1.16982e+07	4.63227e+06	6.85052e+06	7.38304e+06	6.00929e+06	134031	104329	61718.7	197633	130060	7.31466e+06	125554	0.00378318	1.11297	0.0171648	-5.86441
92	N-Acetylsphingosine	C20 H39 N O3	363.276	7.264	9.58059e+06	1.31268e+07	2.95956e+07	1.29532e+07	1.50241e+07	39521.9	37075.5	39303.6	36700.4	38134.7	1.60561e+07	38147.2	0.0101758	1.06988	0.00237588	-8.71732
93	(+/-)9-HpODE	C18 H32 O4	312.229	14.192	8.52019e+06	4.15014e+06	1.05753e+07	5.41882e+06	5.52015e+06	54653.9	38275.4	35955.9	57576.8	54905.2	6.83691e+06	48273.4	0.00450391	1.10988	0.00706071	-7.14597
94	2-(8-Hydroxy-4a,8-dimethyldecahydro-2-naphthalenyl)acrylic acid	C15 H24 O3	234.161	14.719	1.33799e+07	9.47251e+06	1.74724e+07	1.09549e+07	1.35997e+07	5.85133e+06	7.15189e+06	6.88131e+06	5.62935e+06	5.56902e+06	1.29759e+07	6.21658e+06	0.00641118	1.07497	0.479087	-1.06164
95	Thromboxane B2	C20 H34 O6	370.235	8.702	3.18644e+06	2.71211e+06	1.382e+06	1.97693e+06	2.02432e+06	61576.7	61241.2	58625.6	66656.5	64215.9	2.25636e+06	62463.2	0.0022016	1.14929	0.0276832	-5.17485
96	1-Linoleoyl glycerol	C21 H38 O4	336.265	12.593	1.69686e+07	1.05734e+07	2.56775e+07	2.08691e+07	1.90857e+07	111466	92262	337278	463250	424852	1.86348e+07	285822	0.00175717	1.16853	0.015338	-6.02674
97	(+/-)9,10-dihydroxy-12Z-octadecenoic acid	C18 H34 O4	314.245	12.115	4.49073e+06	1.79564e+06	4.35055e+06	3.27295e+06	5.55728e+06	36291.1	33400.2	35754.8	65163.6	34652.4	3.89343e+06	41052.4	0.00377367	1.13339	0.010544	-6.56743
98	MDMA Methylene homolog	C12 H17 N O2	207.125	7.402	8.4974e+06	1.48029e+07	1.17912e+07	7.92392e+06	1.06141e+07	435239	502866	319448	402950	467136	1.07259e+07	425528	0.00113039	1.19176	0.0396729	-4.6557
99	Prostaglandin F2?	C20 H34 O5	354.24	8.948	4.59746e+06	8.98354e+06	3.65286e+06	5.45055e+06	5.70414e+06	30196.1	28867.3	29555.3	33290.8	30786.2	5.67771e+06	30539.1	0.00331113	1.1495	0.00537877	-7.53851
100	1-Tetradecylamine	C14 H31 N	213.245	11.028	4.02895e+06	1.99458e+06	5.60776e+06	5.87378e+06	5.03206e+06	1.24336e+06	1.67104e+06	1.27738e+06	1.99268e+06	1.98349e+06	4.50743e+06	1.63359e+06	0.01342	1.02136	0.362422	-1.46426
101	Tanespimycin	C31 H43 N3 O8	567.283	9.197	4.72791e+06	1.73453e+07	1.01938e+07	9.47353e+06	4.84708e+06	33187.2	33207.1	30715.8	35419.1	33275.8	9.31753e+06	33161	0.0157672	1.03183	0.00355899	-8.13432
102	Dioxohongdenafil	C25 H30 N6 O5	494.229	6.813	1.44711e+07	9.30811e+06	1.34454e+07	1.7288e+07	1.55359e+07	41014.6	36184.3	36905.5	37841	38411	1.40097e+07	38071.3	0.000472843	1.20771	0.0027175	-8.5235
103	NP-011548	C18 H34 O3	298.25	22.627	1.16792e+06	612363	1.15817e+06	1.13266e+06	1.75727e+06	55990.5	140857	154872	106150	71638.5	1.16568e+06	105902	0.00406996	1.13191	0.0908501	-3.46037
104	(5ξ,9ξ)-17-Hydroxykaur-15-en-19-oic acid	C20 H30 O3	364.224	9.028	3.90945e+06	7.09589e+06	5.10664e+06	9.9971e+06	1.49469e+07	26776.8	26115.6	24662.8	29521	27705.6	8.21119e+06	26956.4	0.0143103	1.05918	0.00328288	-8.25082
105	CP 47,497-C6-Homolog	C20 H32 O2	304.239	22.327	579090	201698	1.00743e+06	590468	530308	37317.8	35889.5	101909	99452.7	56866.1	581799	66287	0.0153737	1.01436	0.113935	-3.13372
106	N-Acetyl-DL-tryptophan	C13 H14 N2 O3	246.099	7.32	1.20254e+07	8.03063e+06	1.20796e+07	1.11209e+07	1.32915e+07	35567.3	33923.7	35962.4	34542.9	33194.7	1.13096e+07	34638.2	0.000222981	1.22095	0.00306272	-8.35097
107	Decanoylcarnitine	C17 H33 N O4	315.24	9.704	6.42173e+06	3.04641e+06	5.04153e+06	9.20029e+06	1.31964e+07	38955.6	37978.9	39222.1	37038.7	39412.8	7.38127e+06	38521.6	0.0141453	1.04848	0.00521883	-7.58206
108	2,5-di-tert-Butylhydroquinone	C14 H22 O2	222.161	11.044	465138	406696	473273	437869	570702	351642	240929	327731	398629	319074	470736	327601	0.00530711	1.01076	0.695934	-0.522977
109	Cortisone	C21 H28 O5	360.192	8.212	3.17018e+06	5.87757e+06	4.36992e+06	9.81756e+06	7.5341e+06	39506.8	37873.4	38712.5	38924.4	36690.3	6.15387e+06	38341.5	0.00644335	1.11729	0.00623047	-7.32644
110	Pipenzolate	C22 H27 N O3	353.201	11.795	6.35616e+06	3.3719e+06	1.04983e+07	6.01856e+06	1.14177e+07	39836.6	43308.2	40743	37506.9	36208.4	7.53254e+06	39520.6	0.00747902	1.09735	0.00524665	-7.57439
111	Docosahexaenoic acid methyl ester	C23 H34 O2	348.265	17.501	2.26163e+06	729202	2.47359e+06	1.84552e+06	3.74388e+06	130493	94335	272638	265377	114362	2.21077e+06	175441	0.0137476	1.04196	0.0793576	-3.65549
112	Dodecanedioic acid	C12 H22 O4	230.151	9.578	1.08315e+07	9.06326e+06	3.90807e+06	8.12007e+06	4.83968e+06	220592	200679	239159	274649	204634	7.35251e+06	227943	0.00539398	1.09678	0.031002	-5.01149
113	N-[3-(2,6-dimethylmorpholino)propyl]-2,3,4,5,6-pentamethylbenzenesulfonamide	C20 H34 N2 O3 S	382.235	6.648	2.37741e+06	1.95167e+06	1.05901e+06	4.04908e+06	4.77056e+06	26709.5	26174.3	25279.2	28605.4	28306.6	2.84155e+06	27015	0.0146924	1.04625	0.00950715	-6.71677
114	2-Thio-acetyl MAGE	C21 H42 O3 S	356.27	12.19	483099	205153	389542	600954	826666	33135.6	35005.3	37407.9	30457.2	33303.1	501083	33861.8	0.0108809	1.0688	0.0675772	-3.88732

## Sheet: H  vs. M
NO	Name	Formula	Calc. MW	RT [min]	M1	M2	M3	M4	M5	H1	H2	H3	H4	H5	Average(M)	Average(H)	P-value	VIP	FC	LOG2FC
1	Hypoxanthine	C5 H4 N4 O	136.038	1.827	7.41605e+06	1.60011e+06	1.30035e+07	3.56255e+06	1.29051e+07	1.55958e+10	1.48814e+10	1.32451e+10	1.56445e+10	1.5558e+10	7.69745e+06	1.4985e+10	5.15952e-06	1.15114	1946.74	10.9268
2	L-(+)-Lactic acid	C3 H6 O3	90.0299	1.952	5.36328e+07	1.78913e+06	4.00536e+07	1.29625e+06	4.57833e+07	7.64551e+09	4.51294e+09	6.26168e+09	4.72649e+09	5.54895e+09	2.8511e+07	5.73912e+09	0.000551997	1.11576	201.294	7.65316
3	Nicotinamide	C6 H6 N2 O	122.048	1.791	3.60754e+06	1.4043e+07	7.63956e+06	6.61578e+06	1.75292e+07	1.28242e+10	1.19416e+10	1.03464e+10	1.36937e+10	1.25331e+10	9.88702e+06	1.22678e+10	2.52757e-05	1.14717	1240.8	10.2771
4	L-Isoleucine	C6 H13 N O2	131.094	1.947	3.26456e+06	2.00196e+06	2.46854e+06	2.38202e+06	3.63512e+06	8.99437e+09	7.77556e+09	8.07793e+09	1.04989e+10	7.87953e+09	2.75044e+06	8.64526e+09	7.16531e-05	1.14469	3143.23	11.618
5	Valine	C5 H11 N O2	117.079	1.702	7.44242e+06	2.58292e+07	8.27803e+06	2.17921e+06	1.82146e+06	6.19875e+09	4.85678e+09	5.36615e+09	5.27437e+09	4.24443e+09	9.11006e+06	5.1881e+09	8.61414e-05	1.14456	569.491	9.15353
6	L-Norleucine	C6 H13 N O2	131.094	2.349	9.77488e+06	5.55804e+06	3.04727e+06	6.92064e+06	1.00865e+07	2.15732e+09	1.69923e+09	1.91448e+09	2.60773e+09	1.99066e+09	7.07747e+06	2.07389e+09	0.000171093	1.13604	293.026	8.19489
7	Choline	C5 H13 N O	103.1	1.594	1.62543e+07	3.90666e+06	2.3618e+07	9.54329e+06	1.12137e+07	4.4986e+09	5.96993e+09	5.66575e+09	5.16423e+09	5.21856e+09	1.29072e+07	5.30341e+09	2.9397e-05	1.14331	410.889	8.6826
8	Arachidonic acid	C20 H32 O2	304.239	23.048	1.72889e+06	2.56699e+06	662454	1.06036e+07	1.01808e+06	5.63531e+09	5.93243e+09	5.66353e+09	6.98055e+09	7.1428e+09	3.31601e+06	6.27092e+09	4.41569e-05	1.14049	1891.1	10.885
9	Docosahexaenoic Acid	C22 H32 O2	328.239	22.171	789986	1.31459e+06	298016	4.34688e+06	693097	5.14017e+09	4.83945e+09	5.26012e+09	5.59984e+09	4.3609e+09	1.48851e+06	5.04009e+09	1.7544e-05	1.15224	3385.99	11.7254
10	Xanthine	C5 H4 N4 O2	152.032	1.838	2.90179e+06	2.15229e+06	925067	2.34173e+06	1.78713e+06	3.20546e+09	3.30405e+09	3.16459e+09	3.36962e+09	1.43571e+09	2.0216e+06	2.89589e+09	0.00139609	1.09987	1432.47	10.4843
11	Stearamide	C18 H37 N O	283.286	27.414	606944	2.21362e+06	1.60902e+06	4.16271e+06	1.44127e+06	2.54538e+09	1.59622e+09	1.9121e+09	1.77831e+09	1.67693e+09	2.00671e+06	1.90179e+09	0.000359442	1.12654	947.713	9.88831
12	DL-Tryptophan	C11 H12 N2 O2	204.089	5.891	753443	617069	1.80447e+06	824592	1.21263e+06	5.69218e+08	3.87876e+08	4.91252e+08	6.82197e+08	5.1161e+08	1.04244e+06	5.28431e+08	0.000400611	1.12441	506.916	8.9856
13	trans-3-Indoleacrylic acid	C11 H9 N O2	187.063	5.891	328440	395620	864026	387873	784309	5.44593e+08	3.71178e+08	4.68789e+08	6.51138e+08	4.89617e+08	552054	5.05063e+08	0.000393715	1.12468	914.88	9.83744
14	Taurine	C2 H7 N O3 S	125.013	1.621	553918	78762	1.3788e+06	177487	497890	1.93219e+09	1.62636e+09	1.19573e+09	1.1264e+09	1.41524e+09	537371	1.45918e+09	0.000583233	1.11152	2715.42	11.407
15	D-(+)-Proline	C5 H9 N O2	83.037	1.646	3.66344e+07	3.12337e+07	3.52443e+07	3.37987e+07	3.61395e+07	1.3874e+09	1.23898e+09	1.24421e+09	1.95006e+09	1.68569e+09	3.46101e+07	1.50127e+09	0.00044897	1.11694	43.3766	5.43884
16	L-(-)-Methionine	C5 H11 N O2 S	149.05	2.011	231808	230419	238584	242666	273710	1.28945e+09	1.10332e+09	1.48478e+09	1.57381e+09	1.07436e+09	243437	1.30514e+09	0.00019653	1.1364	5361.31	12.3884
17	L-Tyrosine	C9 H11 N O3	181.073	2.075	351373	1.01422e+06	444948	285849	302290	1.14352e+09	1.05688e+09	1.03865e+09	1.46703e+09	9.51649e+08	479736	1.13154e+09	0.000223113	1.13451	2358.68	11.2038
18	Linoleic acid	C18 H32 O2	280.239	23.791	205064	363484	220205	1.58294e+06	254375	1.20114e+09	1.18136e+09	9.88287e+08	1.67623e+09	1.14422e+09	525214	1.23825e+09	0.000432699	1.12192	2357.61	11.2031
19	DL-Carnitine	C7 H15 N O3	161.105	1.621	1.87438e+06	368846	6.15693e+06	814314	1.39424e+06	1.26615e+09	7.9935e+08	7.42752e+08	7.08735e+08	7.9558e+08	2.12174e+06	8.62513e+08	0.00109395	1.09963	406.512	8.66715
20	Cholic acid	C24 H40 O5	408.287	9.4	127621	103465	191556	118783	143017	6.32226e+08	8.6908e+08	8.48351e+08	4.55954e+08	9.32928e+08	136889	7.47708e+08	0.00108883	1.08438	5462.16	12.4153
21	Oleic acid	C18 H34 O2	282.255	26.943	283236	791962	1.41022e+06	1.98519e+06	266803	1.12656e+09	1.43839e+09	1.58603e+09	1.27599e+09	1.48031e+09	947482	1.38146e+09	6.92195e-05	1.13595	1458.03	10.5098
22	L-Ergothioneine	C9 H15 N3 O2 S	229.087	1.672	181411	175116	372432	221421	180283	5.57177e+07	6.95688e+07	4.16787e+07	4.32882e+07	6.82819e+07	226132	5.57071e+07	0.000722615	1.0974	246.347	7.94455
23	Galactonic acid	C6 H12 O7	196.057	1.631	58302.9	92162.2	112553	82530.7	94373.8	5.21075e+08	3.80185e+08	3.79242e+08	3.6775e+08	4.00094e+08	87984.5	4.09669e+08	0.000133116	1.13643	4656.15	12.1849
24	2,2,6,6-Tetramethyl-1-piperidinol (TEMPO)	C9 H19 N O	157.146	10.093	1.75065e+06	1.73138e+06	1.91863e+06	2.20954e+06	1.9748e+06	1.16597e+09	8.86013e+08	1.23855e+09	9.51803e+08	6.85255e+08	1.917e+06	9.85519e+08	0.000586362	1.11981	514.095	9.00589
25	4-Oxoproline	C5 H7 N O3	129.041	1.936	1.92755e+06	1.20414e+06	1.13774e+06	1.27984e+06	1.79602e+06	3.68512e+08	2.90384e+08	3.81945e+08	3.25287e+08	2.78998e+08	1.46906e+06	3.29025e+08	8.88833e-05	1.14325	223.97	7.80716
26	β-Alanine	C3 H7 N O2	89.0479	1.62	2.18468e+06	1.16769e+06	392976	1.2342e+06	1.8984e+06	4.99152e+08	4.14381e+08	3.84555e+08	6.50839e+08	4.39539e+08	1.37559e+06	4.77693e+08	0.000542855	1.11881	347.264	8.43989
27	2-Amino-1,3,4-octadecanetriol	C18 H39 N O3	317.291	10.318	2.81432e+07	2.12617e+07	2.15379e+07	2.61282e+07	2.47197e+07	6.73602e+08	7.18842e+08	9.3098e+08	6.44599e+08	5.06912e+08	2.43582e+07	6.94987e+08	0.000618136	1.11494	28.532	4.83451
28	Creatine	C4 H9 N3 O2	131.069	1.634	2.85018e+06	855029	2.70763e+06	773911	1.37501e+06	5.68764e+08	3.91658e+08	5.8062e+08	3.32924e+08	2.96888e+08	1.71235e+06	4.34171e+08	0.00188572	1.08533	253.552	7.98614
29	D-Sphingosine	C18 H37 N O2	299.281	12.535	816220	700568	781891	984671	273103	3.24254e+08	3.2015e+08	3.83135e+08	3.49618e+08	2.35581e+08	711291	3.22548e+08	0.000192961	1.13671	453.468	8.82486
30	N,N-Dimethylsphingosine	C20 H41 N O2	309.301	27.779	111908	138593	189639	323764	150608	2.87397e+08	1.29372e+08	2.32895e+08	2.61054e+08	1.62196e+08	182902	2.14583e+08	0.00198629	1.08784	1173.21	10.1962
31	Dibenzylamine	C14 H15 N	90.0466	7.119	569288	626649	1.3518e+06	984477	683068	8.52237e+08	9.83559e+08	9.82656e+08	4.13692e+08	5.29406e+08	843056	7.5231e+08	0.00316723	1.05684	892.361	9.80148
32	Palmitoyl ethanolamide	C18 H37 N O2	299.281	20.414	222545	265249	1.02881e+06	743025	251915	5.38414e+08	5.21179e+08	6.166e+08	4.87549e+08	4.21305e+08	502308	5.1701e+08	8.56665e-05	1.14232	1029.27	10.0074
33	DL-β-Leucine	C6 H13 N O2	131.093	2.021	93198.4	506431	96220.5	96742.1	800377	1.4951e+08	1.2815e+08	1.46254e+08	1.95856e+08	1.26312e+08	318594	1.49216e+08	0.000289078	1.13126	468.359	8.87147
34	Thiamine	C12 H16 N4 O S	264.103	1.497	8.65669e+06	874461	5.01003e+06	3.18812e+06	2.27007e+07	6.14276e+08	5.64871e+08	5.29797e+08	7.24976e+08	7.49965e+08	8.08601e+06	6.36777e+08	0.000121427	1.13163	78.7505	6.29922
35	DL-Glutamine	C5 H10 N2 O3	146.069	1.619	1.13651e+06	1.48263e+06	3.36287e+06	1.74966e+06	989498	4.39552e+08	3.6554e+08	3.35831e+08	1.75204e+08	2.35968e+08	1.74424e+06	3.10419e+08	0.00278064	1.06478	177.968	7.47548
36	L-Kynurenine	C10 H12 N2 O3	208.084	3.466	80003	69712.6	132808	68303.8	82731	3.77446e+07	4.091e+07	2.63009e+07	4.28914e+07	1.85281e+07	86711.7	3.3275e+07	0.00207715	1.08469	383.743	8.584
37	α-Eleostearic acid	C18 H30 O2	278.224	21.422	48084	47679.2	44040.8	85125.3	44809.9	3.2805e+08	2.81354e+08	2.66787e+08	2.73326e+08	2.42004e+08	53947.8	2.78304e+08	3.85626e-05	1.1481	5158.76	12.3328
38	L-Histidine	C6 H9 N3 O2	155.069	1.467	1.15698e+06	957143	564865	410831	457410	2.0292e+08	1.3813e+08	1.77855e+08	1.91419e+08	1.71523e+08	709445	1.76369e+08	8.9669e-05	1.14212	248.602	7.95769
39	L-Glutamic acid	C5 H9 N O4	147.053	1.628	1.01567e+06	1.66662e+06	1.42483e+06	1.8944e+06	967725	2.31867e+08	2.26491e+08	1.8602e+08	2.04321e+08	2.25716e+08	1.39385e+06	2.14883e+08	1.56524e-05	1.1467	154.165	7.26833
40	Acetyl-L-carnitine	C9 H17 N O4	203.115	1.816	114459	98485	134371	106127	118396	1.97187e+08	1.63045e+08	1.29981e+08	1.02697e+08	8.71339e+07	114368	1.36009e+08	0.00245514	1.07435	1189.22	10.2158
41	8Z,11Z,14Z-Eicosatrienoic acid	C20 H34 O2	306.255	24.866	36638.9	30687.9	30572.9	190456	20341.9	1.94522e+08	2.18085e+08	2.03621e+08	2.53261e+08	2.11285e+08	61739.5	2.16155e+08	2.79211e-05	1.14675	3501.08	11.7736
42	Stearoyl ethanolamide	C20 H41 N O2	327.312	25.428	138844	129178	244955	267386	202650	1.9008e+08	9.85102e+07	1.11903e+08	1.43421e+08	1.42025e+08	196603	1.37188e+08	0.000974559	1.10325	697.793	9.44666
43	Oleamide	C18 H35 N O	281.27	23.204	1.8632e+06	1.53624e+06	2.25976e+06	2.73736e+06	1.28446e+06	2.31778e+08	1.71992e+08	2.05774e+08	1.92982e+08	1.63386e+08	1.93621e+06	1.93182e+08	9.67511e-05	1.1432	99.7738	6.64059
44	Urocanic acid	C6 H6 N2 O2	138.042	1.929	920533	2.96067e+06	5.56992e+06	3.78462e+06	1.19955e+07	1.85635e+08	1.967e+08	1.82026e+08	1.98504e+08	2.15833e+08	5.04624e+06	1.9574e+08	1.06709e-06	1.148	38.7892	5.27758
45	L-Phenylalanine	C9 H11 N O2	165.077	3.26	315186	126797	63583.7	69199.8	382745	3.63687e+07	3.17483e+07	3.18246e+07	4.2854e+07	2.83108e+07	191502	3.42213e+07	0.0001699	1.13832	178.699	7.48139
46	Adrenic acid	C22 H36 O2	332.271	25.925	28082.6	38502.1	202504	139449	23723.2	2.93198e+08	1.49536e+08	3.00095e+08	2.43102e+08	2.0881e+08	86452.3	2.38948e+08	0.00102632	1.10469	2763.93	11.4325
47	Propionylcarnitine	C10 H19 N O4	217.131	2.509	712220	320105	266821	275589	248167	2.00211e+07	1.58424e+07	1.14213e+07	1.66485e+07	1.81226e+07	364580	1.64112e+07	0.000353133	1.11969	45.0139	5.4923
48	Docosapentaenoic acid	C22 H34 O2	330.255	23.506	89003.4	75748.6	163587	274469	107250	1.39147e+08	1.45619e+08	1.44401e+08	1.90781e+08	1.70054e+08	142012	1.58e+08	8.62185e-05	1.1379	1112.59	10.1197
49	Palmitoleic acid	C16 H30 O2	254.224	22.854	110680	96357.2	263324	495047	113098	1.8251e+08	2.37224e+08	1.56028e+08	2.70746e+08	2.99599e+08	215701	2.29221e+08	0.00101799	1.09018	1062.68	10.0535
50	Arachidonic acid ethyl ester	C22 H36 O2	338.281	17.225	2.66377e+06	1.23731e+06	1.85183e+06	3.9063e+06	3.25279e+06	3.03537e+08	1.33299e+08	1.85209e+08	1.89173e+08	1.53643e+08	2.5824e+06	1.92972e+08	0.00296402	1.06921	74.7259	6.22354
51	Oleoyl ethanolamide	C20 H39 N O2	325.296	21.366	109343	72919.2	87820.5	107229	77484.9	2.08567e+08	1.83664e+08	2.05233e+08	2.10699e+08	1.55892e+08	90959.2	1.92811e+08	5.01865e-05	1.14852	2119.75	11.0497
52	Pipecolic acid	C6 H11 N O2	129.078	1.465	1.57283e+06	156250	1.51185e+06	1.32421e+06	1.64078e+06	4.20263e+07	5.13293e+07	4.48961e+07	5.2009e+07	3.62427e+07	1.24118e+06	4.53007e+07	0.000106535	1.1395	36.4979	5.18974
53	Bis(4-ethylbenzylidene)sorbitol	C24 H30 O6	414.202	11.265	77920.9	75145.4	255114	130120	78790.9	1.5042e+08	1.583e+08	2.22134e+08	1.29387e+08	1.43207e+08	123418	1.6069e+08	0.000565319	1.11232	1301.99	10.3465
54	Linoleoyl Ethanolamide	C20 H37 N O2	323.281	17.882	67444	71030.9	319331	176090	57601	1.27263e+08	1.21065e+08	1.41711e+08	1.3659e+08	1.1772e+08	138299	1.2887e+08	9.19017e-06	1.15278	931.817	9.8639
55	Uracil	C4 H4 N2 O2	112.027	1.856	386151	682247	880624	1.09695e+06	200924	2.48123e+08	1.80271e+08	2.62434e+08	1.95784e+08	2.04528e+08	649380	2.18228e+08	0.000160155	1.13506	336.056	8.39256
56	Palmitic acid	C16 H32 O2	256.239	26.682	147444	227904	185654	346502	162987	2.01659e+08	1.94691e+08	2.04217e+08	2.39183e+08	2.24177e+08	214098	2.12785e+08	1.32768e-05	1.1488	993.868	9.95691
57	2-Fluoro-6-(4-methoxyphenoxy)benzonitrile	C14 H10 F N O2	243.071	1.646	36556.9	37271.6	39610.1	34339.6	36899.6	3.8742e+07	5.5067e+07	6.85263e+07	5.95718e+07	4.99487e+07	36935.5	5.43712e+07	0.000394012	1.11922	1472.06	10.5236
58	N-Arachidonoyl taurine	C22 H37 N O4 S	411.243	15.739	168210	191926	238510	168243	166932	1.34178e+08	1.51115e+08	1.01563e+08	9.70467e+07	9.29271e+07	186764	1.15366e+08	0.000565384	1.11368	617.709	9.27078
59	Adenosine	C10 H13 N5 O4	267.095	1.816	75126	38140.7	38765.7	32866.9	66921.9	5.68384e+07	8.01539e+07	4.87181e+07	4.74798e+07	6.3767e+07	50364.2	5.93914e+07	0.000574849	1.10506	1179.24	10.2036
60	N-{4-[(2R,3R)-3-(Hydroxymethyl)-4-methyl-5-oxo-2-morpholinyl]phenyl}-2-methylbenzamide	C20 H22 N2 O4	376.137	6.071	174065	162108	177585	157249	170516	1.00053e+08	1.98771e+08	1.48285e+08	1.48599e+08	1.61275e+08	168305	1.51397e+08	0.000666431	1.10151	899.539	9.81304
61	(9cis)-Retinal	C20 H28 O	284.213	24.547	468000	323475	498574	945338	643635	1.2299e+08	9.30161e+07	4.45539e+07	1.60868e+08	8.77441e+07	575805	1.01834e+08	0.00637201	1.02584	176.856	7.46643
62	N-[(1S,3aS,5S,7aR)-7a-{3-[(2-Furylmethyl)amino]-3-oxopropyl}-5-hydroxy-3,3,5-trimethyloctahydro-1H-inden-1-yl]benzamide	C27 H36 N2 O4	488.244	8.472	28139.7	27329.2	26289.2	29478.7	28153	7.96742e+06	1.89615e+07	8.34854e+06	1.19242e+07	1.23743e+07	27878	1.19152e+07	0.00385197	1.03805	427.405	8.73946
63	NP-008309	C11 H13 N O3	207.088	7.167	151152	101381	161653	90911.7	93310.8	3.99202e+07	5.49042e+07	5.57682e+07	4.76312e+07	6.75851e+07	119681	5.31618e+07	0.000323867	1.11304	444.194	8.79505
64	Deoxycholic acid	C24 H40 O4	392.292	10.436	69176.2	71456.9	65638.4	74132.9	73579.2	5.48968e+07	1.33078e+08	6.51343e+07	9.08555e+07	1.47534e+08	70796.7	9.82998e+07	0.00577726	1.00613	1388.48	10.4393
65	Oleic acid alkyne	C18 H30 O2	278.224	21.009	206421	197098	445402	383641	184016	4.35067e+07	5.33736e+07	4.24759e+07	7.32683e+07	7.754e+07	283316	5.80329e+07	0.00143458	1.0803	204.835	7.67832
66	4-{[5-(7-hydroxy-5,5,8a-trimethyl-2-methylidene-decahydronaphthalen-1-yl)-3-methylpentyl]oxy}-4-oxobutanoic acid	C24 H40 O5	430.268	9.401	207265	77286.7	222882	168411	83044.1	7.07728e+07	1.03746e+08	9.0195e+07	6.33764e+07	1.05738e+08	151778	8.67656e+07	0.000535046	1.10288	571.662	9.15902
67	Cortisol	C21 H30 O5	362.208	8.441	65946	62814.3	63571.2	68406.5	68604.2	4.73468e+07	3.23764e+07	3.00136e+07	2.47103e+07	2.05926e+07	65868.4	3.10079e+07	0.00248581	1.07539	470.756	8.87884
68	α-Linolenoyl ethanolamide	C20 H35 N O2	321.265	19.748	65805.5	67025.7	169520	63529.4	65672.6	1.00256e+08	5.78284e+07	7.7079e+07	7.33048e+07	4.30383e+07	86310.6	7.03014e+07	0.00187384	1.09078	814.516	9.6698
69	2-Aminooctanedioic acid	C8 H15 N O4	189.099	6.277	382793	293940	255272	349852	386937	1.37585e+07	8.07213e+06	1.11377e+07	1.42152e+07	9.16654e+06	333759	1.127e+07	0.000841276	1.11284	33.7669	5.07754
70	Glycyl-L-leucine	C8 H16 N2 O3	188.115	3.843	165672	310678	205537	166854	169524	6.33812e+06	5.46271e+06	4.6267e+06	5.53206e+06	4.40619e+06	203653	5.27316e+06	0.000118928	1.14002	25.8928	4.69448
71	6-keto Prostaglandin F1?	C20 H34 O6	352.223	7.971	156870	105039	112764	111981	115260	3.24166e+07	4.09273e+07	4.79981e+07	4.83257e+07	2.81403e+07	120383	3.95616e+07	0.000634763	1.11592	328.631	8.36032
72	Dibutyl phthalate	C16 H22 O4	278.15	16.693	2.92634e+07	2.63965e+07	2.16111e+07	3.96754e+07	3.00953e+07	5.99106e+07	5.26651e+07	6.07437e+07	5.412e+07	6.57701e+07	2.94083e+07	5.86419e+07	7.40091e-05	1.08122	1.99406	0.995707
73	L(+)-Ornithine	C5 H12 N2 O2	132.09	1.459	367424	416871	333144	346399	393311	7.83597e+06	7.66893e+06	6.07802e+06	1.17391e+07	6.27767e+06	371430	7.91993e+06	0.00176589	1.0885	21.3228	4.41433
74	3-tert-Butyladipic acid	C10 H18 O4	202.119	8.117	907319	827718	900661	903693	1.10753e+06	3.18916e+07	2.9266e+07	1.68354e+07	1.67744e+07	2.74487e+07	929384	2.44432e+07	0.00181864	1.07393	26.3005	4.71702
75	PEG n12	C24 H50 O13	563.35	6.515	1.06588e+06	1.10068e+06	980469	1.24445e+06	953280	3.81534e+06	4.50949e+06	5.3285e+06	7.1053e+06	2.62629e+06	1.06895e+06	4.67699e+06	0.00851471	1.01018	4.3753	2.12938
76	Monoolein	C21 H40 O4	356.291	23.877	2.95376e+06	2.16425e+06	381746	1.91552e+06	1.94886e+06	3.10794e+07	3.56465e+07	3.08275e+07	3.15505e+07	6.32893e+07	1.87283e+06	3.84786e+07	0.00419465	1.02298	20.5457	4.36077
77	Azelaic acid	C9 H16 O4	188.103	7.57	7.02532e+06	6.53539e+06	6.2173e+06	6.54106e+06	6.15888e+06	3.06344e+07	3.21407e+07	2.84873e+07	2.82202e+07	2.7014e+07	6.49559e+06	2.92993e+07	1.03273e-05	1.14916	4.51065	2.17334
78	Anandamide (AEA)	C22 H37 N O2	347.281	17.856	63296.9	66663.2	79867.6	53146.5	55744.3	2.06122e+07	3.98907e+07	4.16486e+07	4.02236e+07	2.29665e+07	63743.7	3.30683e+07	0.00204602	1.07813	518.77	9.01895
79	Phenyl phosphate	C6 H7 O4 P	174.007	27.483	200563	121059	177819	133742	140928	325479	231385	332223	255623	267490	154822	282440	0.00111211	1.01722	1.82429	0.867333
80	Homo-anatoxin	C11 H17 N O	179.13	12.349	42048.6	98888.1	95499.2	140515	82895.4	3.02507e+07	1.97443e+07	3.46027e+07	4.11333e+07	2.16528e+07	91969.3	2.94768e+07	0.00181408	1.09037	320.507	8.32421
81	Decanamide	C10 H21 N O	171.162	10.15	117202	129586	136779	121803	133863	4.78266e+07	3.46962e+07	4.24528e+07	5.18564e+07	2.8584e+07	127847	4.10832e+07	0.000645674	1.12035	321.347	8.32799
82	Cetrimonium	C19 H41 N	283.323	15.812	2.31782e+06	2.84122e+06	3.4246e+06	2.97645e+06	2.51902e+06	1.42197e+07	1.26344e+07	1.85549e+07	2.01336e+07	1.55136e+07	2.81582e+06	1.62112e+07	0.000544417	1.11329	5.75719	2.52537
83	Hexadecanedioic acid	C16 H30 O4	286.214	12.998	63243.6	36532.7	33442.3	42045.2	40128.4	3.62263e+07	1.7195e+07	2.23005e+07	4.47397e+07	3.18527e+07	43078.4	3.04628e+07	0.00344416	1.05855	707.148	9.46587
84	Hexadecanamide	C16 H33 N O	255.255	10.928	91577.3	226389	98526.6	263028	218834	1.72897e+07	1.7635e+07	2.20992e+07	1.63147e+07	1.4415e+07	179671	1.75507e+07	0.000162801	1.13513	97.6825	6.61003
85	4-Phenolsulfonic acid	C6 H6 O4 S	173.997	1.982	7.35974e+06	3.2737e+06	3.17443e+06	2.73239e+06	7.12634e+06	2.17274e+07	2.26016e+07	3.31876e+07	3.5055e+07	2.63043e+07	4.73332e+06	2.77752e+07	0.000459254	1.09136	5.86801	2.55287
86	Linolenic acid ethyl ester	C20 H34 O2	312.265	14.543	81453.7	65638.3	131085	167665	109512	1.38857e+07	1.21854e+07	1.29872e+07	1.17563e+07	1.48876e+07	111071	1.31404e+07	2.11321e-05	1.14394	118.307	6.88639
87	14(S)-HDHA	C22 H32 O3	344.234	15.29	39217.4	38426.8	36482.3	37452.7	38583.6	1.57174e+07	3.87237e+07	1.94833e+07	2.64851e+07	1.7128e+07	38032.6	2.35075e+07	0.00516547	1.02899	618.088	9.27167
88	Myristyl sulfate	C14 H30 O4 S	294.186	18.881	310289	411062	1.1925e+06	1.47009e+06	286489	1.38895e+07	2.15136e+07	3.12476e+07	1.713e+07	1.69921e+07	734086	2.01546e+07	0.00293496	1.05644	27.4553	4.77901
89	11(Z),14(Z)-Eicosadienoic acid	C20 H36 O2	308.271	27.442	23801.8	37076.1	20824	49562.3	31970.2	1.88675e+07	1.21315e+07	2.18944e+07	2.17374e+07	1.91052e+07	32646.9	1.87472e+07	0.000454109	1.11999	574.242	9.16552
90	(±)12(13)-DiHOME	C18 H34 O4	314.245	11.839	922602	754369	822397	1.02399e+06	937516	1.30062e+07	1.82415e+07	1.57604e+07	2.10641e+07	1.65016e+07	892176	1.69148e+07	0.000274748	1.12483	18.959	4.24481
91	N-Desmethyltramadol	C15 H23 N O2	249.169	9.987	4.76728e+06	4.92711e+06	4.11111e+06	1.16924e+07	1.0077e+07	2.99925e+07	2.96826e+07	3.0376e+07	2.96582e+07	2.81142e+07	7.11497e+06	2.95647e+07	7.36556e-05	1.13545	4.15528	2.05495
92	Tetradecanedioic acid	C14 H26 O4	258.182	11.062	104818	73364	99014.2	125249	92757.9	3.14523e+07	1.8972e+07	1.76254e+07	3.14154e+07	2.67951e+07	99040.6	2.5252e+07	0.00106527	1.10045	254.966	7.99416
93	Benzoic acid	C7 H6 O2	122.035	7.031	1.58957e+06	1.24249e+06	1.5293e+06	135733	1.43507e+06	1.07543e+07	1.28956e+07	1.18833e+07	1.12615e+07	1.04783e+07	1.18643e+06	1.14546e+07	3.04383e-07	1.14417	9.65464	3.27122
94	PEG n13	C26 H54 O14	607.376	6.568	673278	759511	697919	633269	774467	2.56652e+06	2.49751e+06	3.68984e+06	4.43583e+06	1.7742e+06	707689	2.99278e+06	0.00838814	1.01224	4.22895	2.0803
95	(±)19(20)-DiHDPA	C22 H34 O4	362.245	12.265	71130.7	75692.6	74319.9	66186.5	69073.5	1.42147e+07	1.44519e+07	1.55817e+07	1.96926e+07	1.34751e+07	71280.6	1.54832e+07	0.000153425	1.13765	217.215	7.76298
96	Ethyl violet	C31 H41 N3	455.323	10.325	42724.5	41466	43705.2	42792.4	42469.7	1.13791e+07	4.20786e+06	7.85691e+06	4.69958e+06	7.55848e+06	42631.6	7.14039e+06	0.00530058	1.03136	167.491	7.38794
97	16-Hydroxyhexadecanoic acid	C16 H32 O3	272.234	21.85	134031	104329	61718.7	197633	130060	1.53561e+07	1.3437e+07	1.61978e+07	1.50451e+07	1.20341e+07	125554	1.4414e+07	4.29427e-05	1.14851	114.803	6.84302
98	16-Heptadecyne-1,2,4-triol	C17 H32 O3	306.218	14.12	168229	81809	169402	317927	202670	7.63002e+06	7.72202e+06	5.60945e+06	1.06713e+07	5.53677e+06	188007	7.43392e+06	0.00148571	1.09453	39.5405	5.30526
99	Fenpropimorph	C20 H33 N O	303.255	19.044	119819	126384	133483	105142	116531	1.03333e+07	9.73865e+06	1.16526e+07	1.00417e+07	6.96637e+06	120272	9.74653e+06	0.000232926	1.13453	81.0373	6.34051
100	Corticosterone	C21 H30 O4	346.213	7.85	37249.6	36911.2	38991.2	34896	37166	2.43052e+07	2.29192e+07	2.03654e+07	1.76956e+07	1.91512e+07	37042.8	2.08873e+07	6.65625e-05	1.14143	563.87	9.13922
101	(+/-)9-HpODE	C18 H32 O4	312.229	14.192	54653.9	38275.4	35955.9	57576.8	54905.2	2.55134e+07	1.20377e+07	1.61796e+07	2.20731e+07	1.75876e+07	48273.4	1.86783e+07	0.00135449	1.09698	386.927	8.59592
102	2-(8-Hydroxy-4a,8-dimethyldecahydro-2-naphthalenyl)acrylic acid	C15 H24 O3	234.161	14.719	5.85133e+06	7.15189e+06	6.88131e+06	5.62935e+06	5.56902e+06	2.04128e+07	1.93173e+07	2.32531e+07	1.86759e+07	1.52404e+07	6.21658e+06	1.93799e+07	0.000321022	1.11757	3.11745	1.64037
103	Thromboxane B2	C20 H34 O6	370.235	8.702	61576.7	61241.2	58625.6	66656.5	64215.9	2.68761e+06	7.35465e+06	6.62131e+06	5.21682e+06	2.47736e+06	62463.2	4.87155e+06	0.00847715	1.00084	77.9907	6.28523
104	1-Linoleoyl glycerol	C21 H38 O4	336.265	12.593	111466	92262	337278	463250	424852	8.58403e+06	3.11888e+06	4.01438e+06	4.80725e+06	4.82828e+06	285822	5.07057e+06	0.00666927	1.02012	17.7403	4.14896
105	20-Hydroxy-(5Z,8Z,11Z,14Z)-eicosatetraenoic acid	C20 H32 O3	320.234	19.348	60699.8	55600.6	54872	62581.8	55299.1	1.79275e+07	1.47874e+07	2.45693e+07	1.19227e+07	6.44383e+06	57810.7	1.51301e+07	0.00756643	1.01669	261.719	8.03187
106	6-Ketoprostaglandin F1α	C20 H34 O6	370.235	8.204	72119.3	69200	68405.4	75090.6	74261.8	1.9919e+06	2.7821e+06	2.24518e+06	2.9849e+06	1.45566e+06	71815.4	2.29195e+06	0.00127783	1.09867	31.9144	4.99614
107	(+/-)9,10-dihydroxy-12Z-octadecenoic acid	C18 H34 O4	314.245	12.115	36291.1	33400.2	35754.8	65163.6	34652.4	4.47164e+06	1.20409e+07	1.34638e+07	1.58739e+07	1.15555e+07	41052.4	1.14811e+07	0.0038795	1.04335	279.671	8.12758
108	MDMA Methylene homolog	C12 H17 N O2	207.125	7.402	435239	502866	319448	402950	467136	1.38139e+07	6.13798e+06	6.5895e+06	1.15118e+07	4.44478e+06	425528	8.4996e+06	0.0104094	1.00042	19.9743	4.32007
109	Prostaglandin F2?	C20 H34 O5	354.24	8.948	30196.1	28867.3	29555.3	33290.8	30786.2	8.56252e+06	1.3098e+07	8.87837e+06	1.28894e+07	6.39169e+06	30539.1	9.96401e+06	0.00161876	1.0895	326.27	8.34992
110	Chenodeoxycholic Acid	C24 H40 O4	438.297	12.198	34815	35209.2	36690.4	34631.4	36322.3	8.6291e+06	1.05702e+07	7.36202e+06	9.06714e+06	1.04393e+07	35533.7	9.21355e+06	0.00010462	1.13158	259.291	8.01843
111	4-Indolecarbaldehyde	C9 H7 N O	145.051	7.827	192497	71704.2	244569	59936.7	227030	6.45749e+06	5.54378e+06	7.13929e+06	3.65242e+06	5.87914e+06	159147	5.73443e+06	0.000662323	1.10491	36.0322	5.17121
112	Arachidonoyl amide	C20 H33 N O	303.255	19.468	88440.1	85329.9	89000.1	74207.6	83137.5	4.45878e+06	6.73781e+06	7.99611e+06	9.21237e+06	5.69117e+06	84023	6.81925e+06	0.00128623	1.09439	81.1593	6.34268
113	1-Tetradecylamine	C14 H31 N	213.245	11.028	1.24336e+06	1.67104e+06	1.27738e+06	1.99268e+06	1.98349e+06	9.14654e+06	5.98585e+06	7.74848e+06	7.38018e+06	5.54796e+06	1.63359e+06	7.1618e+06	0.00067047	1.10561	4.38409	2.13228
114	Dioxohongdenafil	C25 H30 N6 O5	494.229	6.813	41014.6	36184.3	36905.5	37841	38411	745173	1.13634e+06	763295	506121	893640	38071.3	808915	0.00170452	1.07152	21.2474	4.40921
115	NP-011548	C18 H34 O3	298.25	22.627	55990.5	140857	154872	106150	71638.5	1.20966e+07	1.66072e+07	1.61541e+07	1.29133e+07	1.37136e+07	105902	1.4297e+07	9.04131e-05	1.13537	135.002	7.07684
116	(5ξ,9ξ)-17-Hydroxykaur-15-en-19-oic acid	C20 H30 O3	364.224	9.028	26776.8	26115.6	24662.8	29521	27705.6	1.68831e+06	2.15763e+06	1.33297e+06	1.03157e+06	1.27637e+06	26956.4	1.49737e+06	0.00167611	1.07982	55.5479	5.79566
117	5-[(1S,2R,4aR)-5-(Hydroxymethyl)-1,2,4a-trimethyl-1,2,3,4,4a,7,8,8a-octahydro-1-naphthalenyl]-3-methylpentanoic acid	C20 H34 O3	322.25	16.463	54124.7	52633.4	54825.5	57285.8	55492.2	4.94201e+06	1.38704e+07	9.38825e+06	1.29873e+07	8.44507e+06	54872.3	9.92661e+06	0.00363779	1.04753	180.904	7.49908
118	CP 47,497-C6-Homolog	C20 H32 O2	304.239	22.327	37317.8	35889.5	101909	99452.7	56866.1	3.40789e+06	3.79575e+06	4.66322e+06	5.35242e+06	5.29297e+06	66287	4.50245e+06	0.000342691	1.11804	67.9236	6.08584
119	N-Acetyl-DL-tryptophan	C13 H14 N2 O3	246.099	7.32	35567.3	33923.7	35962.4	34542.9	33194.7	4.78145e+06	3.73704e+06	2.82391e+06	3.60177e+06	4.4754e+06	34638.2	3.88391e+06	0.000367193	1.11814	112.128	6.809
120	Cortisone	C21 H28 O5	360.192	8.212	39506.8	37873.4	38712.5	38924.4	36690.3	5.50299e+06	3.78288e+06	3.83633e+06	4.48402e+06	3.88793e+06	38341.5	4.29883e+06	0.000199295	1.13504	112.12	6.80889
121	Docosahexaenoic acid methyl ester	C23 H34 O2	348.265	17.501	130493	94335	272638	265377	114362	3.01033e+06	3.24096e+06	3.79949e+06	4.20468e+06	3.52468e+06	175441	3.55603e+06	5.84818e-05	1.13914	20.2691	4.34121
122	Dodecanedioic acid	C12 H22 O4	230.151	9.578	220592	200679	239159	274649	204634	7.64993e+06	3.94621e+06	5.42451e+06	8.22062e+06	6.48181e+06	227943	6.34462e+06	0.00135351	1.0953	27.8343	4.79879
123	N-[3-(2,6-dimethylmorpholino)propyl]-2,3,4,5,6-pentamethylbenzenesulfonamide	C20 H34 N2 O3 S	382.235	6.648	26709.5	26174.3	25279.2	28605.4	28306.6	1.85144e+06	2.15171e+06	1.50394e+06	1.10626e+06	1.58104e+06	27015	1.63888e+06	0.000774121	1.10121	60.6655	5.9228
124	2-Thio-acetyl MAGE	C21 H42 O3 S	356.27	12.19	33135.6	35005.3	37407.9	30457.2	33303.1	4.47087e+06	5.1672e+06	4.786e+06	4.96836e+06	5.75485e+06	33861.8	5.02945e+06	2.01371e-05	1.14256	148.529	7.2146
125	2,5-di-tert-Butylhydroquinone	C14 H22 O2	222.161	15.024	1.95691e+06	1.82045e+06	1.80865e+06	1.96032e+06	1.9877e+06	5.76927e+06	8.25638e+06	8.23017e+06	5.62828e+06	5.42523e+06	1.90681e+06	6.66187e+06	0.00179848	1.07803	3.49373	1.80477

## Sheet: L vs. M
NO	Name	Formula	Calc. MW	RT [min]	M1	M2	M3	M4	M5	L1	L2	L3	L4	L5	Average(M)	Average(L)	P-value	VIP	FC	LOG2FC
1	Hypoxanthine	C5 H4 N4 O	136.038	1.827	7.41605e+06	1.60011e+06	1.30035e+07	3.56255e+06	1.29051e+07	2.37617e+10	2.79396e+10	2.6767e+10	2.39623e+10	2.58383e+10	7.69745e+06	2.56538e+10	5.76649e-06	1.16552	3332.77	11.7025
2	L-(+)-Lactic acid	C3 H6 O3	90.0299	1.952	5.36328e+07	1.78913e+06	4.00536e+07	1.29625e+06	4.57833e+07	1.84556e+10	1.89255e+10	2.31841e+10	1.30217e+10	2.05092e+10	2.8511e+07	1.88192e+10	0.000353831	1.12953	660.068	9.36647
3	Nicotinamide	C6 H6 N2 O	122.048	1.999	6.64916e+06	4.98307e+07	4.37249e+06	7.42885e+07	7.43387e+06	5.02136e+09	5.51768e+09	6.02508e+09	5.31252e+09	5.27899e+09	2.85149e+07	5.43113e+09	4.94782e-06	1.16781	190.466	7.57339
4	L-Isoleucine	C6 H13 N O2	131.094	1.947	3.26456e+06	2.00196e+06	2.46854e+06	2.38202e+06	3.63512e+06	1.72526e+10	1.70382e+10	1.96162e+10	1.5129e+10	1.73263e+10	2.75044e+06	1.72725e+10	1.71633e-05	1.16222	6279.89	12.6165
5	Valine	C5 H11 N O2	117.079	1.702	7.44242e+06	2.58292e+07	8.27803e+06	2.17921e+06	1.82146e+06	1.30059e+10	1.00187e+10	1.24992e+10	7.27114e+09	9.88044e+09	9.11006e+06	1.05351e+10	0.00052101	1.12192	1156.42	10.1755
6	L-Norleucine	C6 H13 N O2	131.094	2.349	9.77488e+06	5.55804e+06	3.04727e+06	6.92064e+06	1.00865e+07	8.08263e+09	6.08786e+09	9.36267e+09	5.80153e+09	6.4905e+09	7.07747e+06	7.16504e+09	0.000450793	1.1295	1012.37	9.98352
7	Choline	C5 H13 N O	103.1	1.594	1.62543e+07	3.90666e+06	2.3618e+07	9.54329e+06	1.12137e+07	9.94799e+09	8.27689e+09	9.85072e+09	7.12492e+09	7.44502e+09	1.29072e+07	8.52911e+09	0.000134183	1.14582	660.803	9.36808
8	Arachidonic acid	C20 H32 O2	304.239	23.048	1.72889e+06	2.56699e+06	662454	1.06036e+07	1.01808e+06	3.30917e+09	2.33438e+09	2.88413e+09	4.17538e+09	4.2883e+09	3.31601e+06	3.39827e+09	0.000817854	1.13782	1024.81	10.0011
9	L-Phenylalanine	C9 H11 N O2	165.078	3.267	1.22208e+06	1.38899e+06	1.78447e+06	901652	1.49753e+06	4.47204e+09	3.52588e+09	4.18369e+09	3.4012e+09	3.72542e+09	1.35894e+06	3.86164e+09	4.45544e-05	1.15903	2841.65	11.4725
10	Docosahexaenoic Acid	C22 H32 O2	328.239	22.171	789986	1.31459e+06	298016	4.34688e+06	693097	2.02532e+09	1.81054e+09	1.62442e+09	2.0015e+09	1.9054e+09	1.48851e+06	1.87344e+09	1.3683e-05	1.17083	1258.59	10.2976
11	Xanthine	C5 H4 N4 O2	152.032	1.838	2.90179e+06	2.15229e+06	925067	2.34173e+06	1.78713e+06	5.72705e+09	4.30466e+09	4.41455e+09	3.36886e+09	3.39967e+09	2.0216e+06	4.24296e+09	0.000596932	1.11994	2098.81	11.0354
12	DL-Tryptophan	C11 H12 N2 O2	204.089	5.891	753443	617069	1.80447e+06	824592	1.21263e+06	1.82743e+09	1.76317e+09	1.58284e+09	1.61198e+09	1.89839e+09	1.04244e+06	1.73676e+09	9.04808e-06	1.1675	1666.05	10.7022
13	Taurine	C2 H7 N O3 S	125.013	1.621	553918	78762	1.3788e+06	177487	497890	2.82551e+09	2.19891e+09	3.64855e+09	3.77653e+09	3.02906e+09	537371	3.09571e+09	0.000420943	1.14716	5760.85	12.4921
14	D-(+)-Proline	C5 H9 N O2	83.037	1.646	3.66344e+07	3.12337e+07	3.52443e+07	3.37987e+07	3.61395e+07	3.74561e+09	3.08017e+09	2.81111e+09	3.14775e+09	2.94129e+09	3.46101e+07	3.14519e+09	4.22024e-05	1.16215	90.8748	6.50581
15	L-(-)-Methionine	C5 H11 N O2 S	149.05	2.011	231808	230419	238584	242666	273710	2.71719e+09	2.2927e+09	5.63924e+08	2.32518e+09	2.39333e+09	243437	2.05846e+09	0.0056928	1.04642	8455.82	13.0457
16	L-Tyrosine	C9 H11 N O3	181.073	2.075	351373	1.01422e+06	444948	285849	302290	2.35055e+09	1.76269e+09	2.12017e+09	1.84178e+09	1.71892e+09	479736	1.95882e+09	8.31966e-05	1.15551	4083.12	11.9955
17	Linoleic acid	C18 H32 O2	280.239	23.791	205064	363484	220205	1.58294e+06	254375	3.85231e+08	5.04291e+08	5.19696e+08	4.87254e+08	5.73282e+08	525214	4.93951e+08	8.82791e-05	1.15705	940.476	9.87725
18	DL-Carnitine	C7 H15 N O3	161.105	1.621	1.87438e+06	368846	6.15693e+06	814314	1.39424e+06	1.36581e+09	1.57007e+09	1.46526e+09	1.18431e+09	1.82996e+09	2.12174e+06	1.48308e+09	0.000160868	1.14564	698.993	9.44913
19	Oleic acid	C18 H34 O2	282.255	26.943	283236	791962	1.41022e+06	1.98519e+06	266803	3.74632e+08	4.94559e+08	7.2955e+08	5.45151e+08	5.0944e+08	947482	5.30666e+08	0.000765378	1.12257	560.081	9.12949
20	L-Ergothioneine	C9 H15 N3 O2 S	229.087	1.672	181411	175116	372432	221421	180283	1.58733e+08	1.37648e+08	1.62561e+08	1.37754e+08	1.83727e+08	226132	1.56085e+08	5.52078e-05	1.16094	690.235	9.43094
21	Cholic acid	C24 H40 O5	408.287	9.128	97522.7	58909.7	121581	115280	124893	5.95201e+08	1.89629e+08	4.44329e+08	5.59774e+08	3.48062e+08	103637	4.27399e+08	0.00441281	1.07253	4123.99	12.0098
22	4-Phenolsulfonic acid	C6 H6 O4 S	173.997	6.244	4.89592e+08	6.84499e+08	5.15384e+08	5.38423e+08	5.49255e+08	1.03865e+09	1.10531e+09	8.59954e+08	1.07682e+09	1.25039e+09	5.5543e+08	1.06622e+09	0.000336434	1.09615	1.91964	0.940832
23	?-Muricholic Acid	C24 H40 O5	454.292	9.071	82865.9	65217.5	91922.7	95166.3	218907	6.83788e+08	1.59549e+08	6.98438e+08	4.79771e+08	3.18584e+08	110816	4.68026e+08	0.0109115	1.0012	4223.45	12.0442
24	Galactonic acid	C6 H12 O7	196.057	1.631	58302.9	92162.2	112553	82530.7	94373.8	7.53582e+08	6.83384e+08	7.00742e+08	5.47495e+08	8.8042e+08	87984.5	7.13125e+08	0.000188611	1.14504	8105.11	12.9846
25	4-Oxoproline	C5 H7 N O3	129.041	1.936	1.92755e+06	1.20414e+06	1.13774e+06	1.27984e+06	1.79602e+06	9.54152e+08	8.87858e+08	7.89337e+08	5.79332e+08	9.89736e+08	1.46906e+06	8.40083e+08	0.000337884	1.13165	571.851	9.1595
26	β-Alanine	C3 H7 N O2	89.0479	1.62	2.18468e+06	1.16769e+06	392976	1.2342e+06	1.8984e+06	9.30638e+08	7.50029e+08	9.20326e+08	6.70629e+08	8.73389e+08	1.37559e+06	8.29002e+08	8.41351e-05	1.15325	602.652	9.23518
27	2-Amino-1,3,4-octadecanetriol	C18 H39 N O3	317.291	10.318	2.81432e+07	2.12617e+07	2.15379e+07	2.61282e+07	2.47197e+07	4.89143e+08	5.09403e+08	5.09558e+08	7.92067e+08	3.42547e+08	2.43582e+07	5.28544e+08	0.00229042	1.09847	21.6988	4.43954
28	Creatine	C4 H9 N3 O2	131.069	1.634	2.85018e+06	855029	2.70763e+06	773911	1.37501e+06	8.32927e+08	8.42224e+08	8.57514e+08	6.68106e+08	8.57575e+08	1.71235e+06	8.11669e+08	2.35668e-05	1.15916	474.009	8.88877
29	all-cis-4,7,10,13,16-Docosapentaenoic acid	C22 H34 O2	330.255	24.592	105950	121471	98590.9	295639	76062	1.55073e+08	1.40733e+08	1.16111e+08	2.60732e+08	1.34534e+08	139543	1.61437e+08	0.00324306	1.09032	1156.9	10.176
30	2-(acetylamino)-4-(methylthio)butanoic acid	C7 H13 N O3 S	191.061	5.93	472801	420659	375047	417232	381259	3.50088e+08	3.77643e+08	4.5567e+08	4.28008e+08	4.18936e+08	413400	4.06069e+08	2.71357e-05	1.16714	982.268	9.93997
31	DL-β-Leucine	C6 H13 N O2	131.093	2.021	93198.4	506431	96220.5	96742.1	800377	7.23207e+08	5.81167e+08	7.16031e+08	4.96899e+08	5.08148e+08	318594	6.0509e+08	0.000246749	1.13749	1899.25	10.8912
32	DEET	C12 H17 N O	191.13	10.033	3.58435e+07	3.66371e+07	4.63447e+07	3.83383e+07	4.52243e+07	2.07427e+08	2.5044e+08	1.60586e+08	4.18068e+08	2.32381e+08	4.04776e+07	2.5378e+08	0.00812292	1.03648	6.26965	2.64839
33	Thiamine	C12 H16 N4 O S	264.103	1.639	8.58179e+06	804088	4.94009e+06	3.121e+06	2.24638e+07	3.41389e+08	2.73188e+08	1.60154e+08	4.02926e+08	2.18318e+08	7.98216e+06	2.79195e+08	0.00312636	1.0833	34.9774	5.12835
34	DL-Glutamine	C5 H10 N2 O3	146.069	1.619	1.13651e+06	1.48263e+06	3.36287e+06	1.74966e+06	989498	3.67352e+08	4.54828e+08	6.74238e+08	4.53349e+08	5.68521e+08	1.74424e+06	5.03658e+08	0.000708104	1.12342	288.756	8.1737
35	6-Chloro-5-methyl-1H-1,2,3-benzotriazole	C7 H6 Cl N3	167.024	1.667	34338.2	33720.3	31679.5	34345.3	36716.3	5.1287e+08	4.0628e+08	3.86141e+08	5.66974e+08	5.30174e+08	34159.9	4.80488e+08	0.000175214	1.15999	14065.8	13.7799
36	Taurodeoxycholic acid	C26 H45 N O6 S	481.284	8.368	98424.8	91057.1	97118.7	322650	98867.2	3.10127e+08	1.08251e+08	3.80205e+08	2.56157e+08	2.73685e+08	141623	2.65685e+08	0.00403933	1.06915	1875.99	10.8734
37	α-Eleostearic acid	C18 H30 O2	278.224	21.422	48084	47679.2	44040.8	85125.3	44809.9	7.67879e+07	7.18905e+07	8.39862e+07	8.85381e+07	8.04531e+07	53947.8	8.03312e+07	9.69292e-06	1.17341	1489.05	10.5402
38	L-Histidine	C6 H9 N3 O2	155.069	1.467	1.15698e+06	957143	564865	410831	457410	4.3892e+08	3.63113e+08	3.47796e+08	2.63288e+08	5.05952e+08	709445	3.83814e+08	0.000755086	1.11908	541.006	9.0795
39	11,12-Epoxy-(5Z,8Z,11Z)-icosatrienoic acid	C20 H32 O3	320.234	15.713	38965.8	38269.2	225338	102835	39668.3	1.51996e+08	8.8005e+07	1.29308e+08	1.27395e+08	6.57851e+07	89015.1	1.12498e+08	0.00195058	1.09639	1263.8	10.3036
40	trans-3-Indoleacrylic acid	C11 H9 N O2	187.063	2.052	228009	292668	286359	244523	392975	7.74344e+06	7.41252e+06	7.87549e+06	6.76912e+06	7.46999e+06	288907	7.45411e+06	2.0171e-06	1.16776	25.8011	4.68936
41	L-Glutamic acid	C5 H9 N O4	147.053	1.628	1.01567e+06	1.66662e+06	1.42483e+06	1.8944e+06	967725	3.48094e+08	3.23375e+08	3.06141e+08	2.94659e+08	4.58792e+08	1.39385e+06	3.46212e+08	0.000308202	1.14244	248.386	7.95644
42	Acetyl-L-carnitine	C9 H17 N O4	203.115	1.816	114459	98485	134371	106127	118396	1.802e+08	2.52575e+08	2.77356e+08	1.48212e+08	1.27277e+08	114368	1.97124e+08	0.00252032	1.06449	1723.6	10.7512
43	8Z,11Z,14Z-Eicosatrienoic acid	C20 H34 O2	306.255	24.866	36638.9	30687.9	30572.9	190456	20341.9	9.36048e+07	9.11995e+07	1.08007e+08	1.65606e+08	9.18401e+07	61739.5	1.10051e+08	0.00150731	1.11887	1782.51	10.7997
44	Oleamide	C18 H35 N O	281.27	23.204	1.8632e+06	1.53624e+06	2.25976e+06	2.73736e+06	1.28446e+06	3.84285e+07	3.45188e+07	3.7619e+07	5.05502e+07	8.73985e+07	1.93621e+06	4.9703e+07	0.00821047	1.03075	25.6703	4.68203
45	Urocanic acid	C6 H6 N2 O2	138.042	1.929	920533	2.96067e+06	5.56992e+06	3.78462e+06	1.19955e+07	3.77046e+08	2.5557e+08	3.10685e+08	3.91983e+08	3.02726e+08	5.04624e+06	3.27602e+08	0.000202503	1.15656	64.92	6.02059
46	Adrenic acid	C22 H36 O2	332.271	25.925	28082.6	38502.1	202504	139449	23723.2	4.94978e+07	5.24143e+07	4.60811e+07	9.06034e+07	5.06597e+07	86452.3	5.78512e+07	0.00219295	1.10607	669.169	9.38623
47	Propionylcarnitine	C10 H19 N O4	217.131	2.509	712220	320105	266821	275589	248167	1.43642e+08	1.66159e+08	8.06756e+07	9.60618e+07	9.576e+07	364580	1.1646e+08	0.00206845	1.07695	319.435	8.31938
48	Stearamide	C18 H37 N O	283.286	25.069	139499	106922	172781	99898.7	152019	4.61117e+07	4.13259e+07	6.31803e+07	6.49189e+07	4.93585e+07	134224	5.29791e+07	0.000357797	1.14822	394.706	8.62464
49	Docosapentaenoic acid	C22 H34 O2	330.255	23.506	89003.4	75748.6	163587	274469	107250	4.81181e+07	4.93431e+07	5.93845e+07	7.20882e+07	5.85443e+07	142012	5.74957e+07	0.000184694	1.15911	404.866	8.6613
50	Palmitoleic acid	C16 H30 O2	254.224	22.854	110680	96357.2	263324	495047	113098	8.5884e+07	1.24414e+08	1.43911e+08	9.83697e+07	1.106e+08	215701	1.12636e+08	0.000370534	1.13048	522.183	9.02841
51	Arachidonic acid ethyl ester	C22 H36 O2	338.281	17.225	2.66377e+06	1.23731e+06	1.85183e+06	3.9063e+06	3.25279e+06	1.3593e+08	1.39476e+08	2.02905e+08	1.93554e+08	1.39355e+08	2.5824e+06	1.62244e+08	0.000412676	1.14188	62.8269	5.97331
52	Oleoyl ethanolamide	C20 H39 N O2	325.296	21.366	109343	72919.2	87820.5	107229	77484.9	9.80922e+07	8.38525e+07	9.26422e+07	9.03103e+07	7.05222e+07	90959.2	8.70839e+07	5.13656e-05	1.16002	957.394	9.90297
53	Pipecolic acid	C6 H11 N O2	129.078	1.465	1.57283e+06	156250	1.51185e+06	1.32421e+06	1.64078e+06	1.62353e+08	1.00621e+08	1.81296e+08	7.17191e+07	2.08365e+08	1.24118e+06	1.44871e+08	0.00486433	1.04534	116.72	6.86691
54	Bis(4-ethylbenzylidene)sorbitol	C24 H30 O6	414.202	11.265	77920.9	75145.4	255114	130120	78790.9	5.12089e+07	8.62092e+07	7.01311e+07	1.08251e+08	4.50501e+07	123418	7.217e+07	0.00338841	1.07505	584.76	9.1917
55	Linoleoyl Ethanolamide	C20 H37 N O2	323.281	17.882	67444	71030.9	319331	176090	57601	5.73854e+07	5.34964e+07	5.07681e+07	5.69127e+07	4.81791e+07	138299	5.33483e+07	7.1374e-06	1.17015	385.745	8.5915
56	Uracil	C4 H4 N2 O2	112.027	1.856	386151	682247	880624	1.09695e+06	200924	1.78937e+08	1.54549e+08	1.04085e+08	1.58378e+08	1.5672e+08	649380	1.50534e+08	0.000269096	1.14629	231.812	7.85681
57	L-Kynurenine	C10 H12 N2 O3	191.057	1.974	174540	154208	163181	92076.8	138658	2.61861e+08	1.51931e+08	2.0718e+08	1.39498e+08	8.65526e+07	144533	1.69404e+08	0.00487803	1.04074	1172.08	10.1949
58	2-Fluoro-6-(4-methoxyphenoxy)benzonitrile	C14 H10 F N O2	243.071	1.646	36556.9	37271.6	39610.1	34339.6	36899.6	1.65879e+08	1.7613e+08	2.02284e+08	2.23754e+08	2.02534e+08	36935.5	1.94116e+08	4.73745e-05	1.16794	5255.54	12.3596
59	4-Acetamidobenzoic acid	C9 H9 N O3	179.057	6.552	149763	219496	261881	184824	204339	7.82032e+06	3.22287e+06	3.76615e+06	4.74295e+06	6.61908e+06	204061	5.23427e+06	0.00438827	1.06476	25.6506	4.68092
60	N-Arachidonoyl taurine	C22 H37 N O4 S	411.243	15.739	168210	191926	238510	168243	166932	1.16839e+08	6.14284e+07	8.36565e+07	9.44133e+07	8.67988e+07	186764	8.86272e+07	0.000585065	1.13751	474.541	8.89039
61	Adenosine	C10 H13 N5 O4	267.095	1.816	75126	38140.7	38765.7	32866.9	66921.9	4.26255e+07	4.92787e+07	9.52334e+07	5.6318e+07	6.41783e+07	50364.2	6.15268e+07	0.00256416	1.08156	1221.64	10.2546
62	Hexadecanamide	C16 H33 N O	255.255	22.576	900879	778037	848157	964436	417329	5.66855e+07	3.21319e+07	7.17243e+07	7.23912e+07	5.17017e+07	781768	5.69269e+07	0.00163108	1.11454	72.8182	6.18623
63	(9cis)-Retinal	C20 H28 O	284.213	24.547	468000	323475	498574	945338	643635	2.04679e+07	1.9607e+07	1.14381e+07	3.71915e+07	2.26451e+07	575805	2.22699e+07	0.00657979	1.05381	38.6762	5.27337
64	Methyl palmitate	C17 H34 O2	287.281	10.751	2.1366e+07	2.29346e+07	1.97259e+07	2.32919e+07	2.31479e+07	6.22145e+07	3.7971e+07	4.88081e+07	3.72855e+07	3.84542e+07	2.20933e+07	4.49466e+07	0.00841885	1.00088	2.0344	1.02461
65	NP-008309	C11 H13 N O3	207.088	7.167	151152	101381	161653	90911.7	93310.8	1.45569e+08	1.13061e+08	1.04625e+08	1.46241e+08	1.40768e+08	119681	1.30053e+08	0.000123116	1.16164	1086.66	10.0857
66	Oleic acid alkyne	C18 H30 O2	278.224	21.009	206421	197098	445402	383641	184016	1.09942e+07	1.63799e+07	2.12705e+07	1.96374e+07	1.57726e+07	283316	1.68109e+07	0.000734211	1.12689	59.3363	5.89084
67	18-HETE	C20 H32 O3	302.223	15.712	45906.8	61089.2	153286	80030.6	46767.2	4.54606e+07	2.36278e+07	4.02439e+07	3.61813e+07	2.26392e+07	77416	3.36305e+07	0.00177757	1.10068	434.413	8.76292
68	4-{[5-(7-hydroxy-5,5,8a-trimethyl-2-methylidene-decahydronaphthalen-1-yl)-3-methylpentyl]oxy}-4-oxobutanoic acid	C24 H40 O5	430.268	9.401	207265	77286.7	222882	168411	83044.1	1.34329e+08	5.38458e+07	9.32069e+07	1.1051e+08	7.76883e+07	151778	9.39159e+07	0.00241364	1.09656	618.772	9.27326
69	1-Linoleoyl glycerol	C21 H38 O4	336.265	14.239	251149	419405	786422	1.22356e+06	1.02683e+06	3.9454e+07	4.23429e+07	5.07854e+07	5.28836e+07	4.7403e+07	741474	4.65738e+07	5.01951e-05	1.16614	62.8124	5.97298
70	Cortisol	C21 H30 O5	362.208	8.441	65946	62814.3	63571.2	68406.5	68604.2	6.32883e+07	4.96733e+07	8.26943e+07	9.4357e+07	1.19988e+08	65868.4	8.20002e+07	0.00258274	1.09879	1244.91	10.2818
71	α-Linolenoyl ethanolamide	C20 H35 N O2	321.265	19.748	65805.5	67025.7	169520	63529.4	65672.6	1.2435e+07	1.20666e+07	1.15091e+07	2.46265e+07	1.80948e+07	86310.6	1.57464e+07	0.00340277	1.09189	182.439	7.51127
72	2-Aminooctanedioic acid	C8 H15 N O4	189.099	6.277	382793	293940	255272	349852	386937	8.46596e+07	5.48217e+07	8.03226e+07	6.69047e+07	6.05396e+07	333759	6.94496e+07	0.000265032	1.1448	208.083	7.70102
73	3-Indoxyl sulphate	C8 H7 N O4 S	213.008	6.595	33008.4	34171.9	31240.8	35351.3	35537.5	2.55799e+07	3.32577e+07	2.18478e+07	3.27018e+07	3.14643e+07	33862	2.89703e+07	0.000208732	1.14974	855.54	9.74069
74	Taurodeoxycholic Acid (sodium salt)	C26 H45 N O6 S	521.276	9.198	40878.5	43448.1	50080.7	43382.2	42911.2	5.57513e+07	3.37428e+07	7.03825e+07	4.7202e+07	6.38697e+07	44140.2	5.41897e+07	0.00108474	1.11789	1227.67	10.2617
75	16-Hydroxyhexadecanoic acid	C16 H32 O3	272.234	13.763	114131	86175.5	156041	148829	121989	2.38818e+07	1.56316e+07	1.57849e+07	2.16909e+07	1.50723e+07	125433	1.84123e+07	0.000554876	1.13732	146.79	7.19761
76	Hexanoylcarnitine	C13 H25 N O4	259.177	7.093	70199.5	97875.3	116689	132114	88990.4	7.82131e+06	1.79486e+07	9.04208e+06	1.28249e+07	1.29997e+07	101174	1.21273e+07	0.00248955	1.07707	119.866	6.90528
77	Taurochenodeoxycholic acid	C26 H45 N O6 S	521.276	8.943	75198.9	74152.8	73023.2	76293.1	68731.3	6.22577e+07	2.63282e+07	6.69808e+07	6.13357e+07	5.94968e+07	73479.9	5.52798e+07	0.00167503	1.11274	752.313	9.55519
78	Azelaic acid	C9 H16 O4	188.103	7.57	7.02532e+06	6.53539e+06	6.2173e+06	6.54106e+06	6.15888e+06	4.83291e+07	6.26728e+07	4.02377e+07	3.4726e+07	4.15447e+07	6.49559e+06	4.55021e+07	0.00124664	1.09128	7.00507	2.8084
79	Anandamide (AEA)	C22 H37 N O2	347.281	17.856	63296.9	66663.2	79867.6	53146.5	55744.3	2.5073e+07	1.16796e+07	1.15237e+07	1.23324e+07	9.49285e+06	63743.7	1.40203e+07	0.00760907	1.01861	219.948	7.78102
80	Eicosapentaenoic acid ethyl ester	C22 H34 O2	330.254	21.608	57241.5	55276.8	64076	54693.6	67582.5	7.80052e+06	5.08977e+06	5.30309e+06	7.7828e+06	9.58472e+06	59774.1	7.11218e+06	0.00114458	1.12538	118.984	6.89463
81	Homo-anatoxin	C11 H17 N O	179.13	12.349	42048.6	98888.1	95499.2	140515	82895.4	1.07426e+07	9.81093e+06	1.1145e+07	2.32687e+07	9.46777e+06	91969.3	1.2887e+07	0.00806336	1.04048	140.123	7.13055
82	Thymidine 5'-monophosphate	C10 H15 N2 O8 P	322.05	7.683	31641.3	31527.8	29847.9	34100	32033.6	333293	132837	216068	203750	171578	31830.1	211505	0.00594121	1.04258	6.64481	2.73223
83	Hexadecanedioic acid	C16 H30 O4	286.214	12.998	63243.6	36532.7	33442.3	42045.2	40128.4	1.48122e+07	1.2058e+07	1.39933e+07	1.18727e+07	1.43671e+07	43078.4	1.34206e+07	2.53588e-05	1.16397	311.54	8.28327
84	Deoxycholic acid	C24 H40 O4	392.292	10.005	54304.3	53106	51690.4	56068.9	54969.9	2.42058e+07	9.9747e+06	2.89538e+07	2.21837e+07	2.04649e+07	54027.9	2.11566e+07	0.00253994	1.09251	391.587	8.61319
85	Linolenic acid ethyl ester	C20 H34 O2	312.265	14.543	81453.7	65638.3	131085	167665	109512	2.33564e+07	1.55643e+07	3.87954e+07	1.52215e+07	2.78749e+07	111071	2.41625e+07	0.00532683	1.04006	217.541	7.76515
86	14(S)-HDHA	C22 H32 O3	344.234	15.29	39217.4	38426.8	36482.3	37452.7	38583.6	5.64752e+06	4.46451e+06	4.56106e+06	6.92344e+06	2.07041e+06	38032.6	4.73339e+06	0.00422386	1.06572	124.456	6.95949
87	Myristyl sulfate	C14 H30 O4 S	294.186	18.881	310289	411062	1.1925e+06	1.47009e+06	286489	8.71551e+06	6.51818e+06	8.40369e+06	1.51812e+07	7.77874e+06	734086	9.31947e+06	0.00426607	1.07182	12.6953	3.66623
88	(±)12(13)-DiHOME	C18 H34 O4	314.245	11.839	922602	754369	822397	1.02399e+06	937516	1.0047e+07	1.31873e+07	1.3341e+07	1.1665e+07	1.12466e+07	892176	1.18974e+07	5.45316e-05	1.15522	13.3353	3.73718
89	Tetradecanedioic acid	C14 H26 O4	258.182	11.062	104818	73364	99014.2	125249	92757.9	1.90752e+07	1.69727e+07	2.04564e+07	1.38358e+07	1.96187e+07	99040.6	1.79918e+07	0.00011302	1.14875	181.661	7.5051
90	PPG n4	C12 H26 O5	250.177	6.986	348249	180275	294312	291287	308514	2.0422e+07	2.68901e+07	2.03121e+07	3.10992e+07	1.65394e+07	284527	2.30526e+07	0.000951586	1.12099	81.0205	6.34022
91	Chenodeoxycholic Acid	C24 H40 O4	438.297	10.006	26868.2	26275.3	25574.9	27741.3	27197.5	1.91105e+07	7.46801e+06	2.26022e+07	1.73834e+07	1.60463e+07	26731.4	1.65221e+07	0.00279943	1.08867	618.077	9.27164
92	(±)19(20)-DiHDPA	C22 H34 O4	362.245	12.265	71130.7	75692.6	74319.9	66186.5	69073.5	7.51209e+06	9.81636e+06	7.29465e+06	1.03634e+07	9.16294e+06	71280.6	8.82989e+06	0.000139878	1.15585	123.875	6.95274
93	16-Heptadecyne-1,2,4-triol	C17 H32 O3	306.218	14.12	168229	81809	169402	317927	202670	1.21441e+07	9.01378e+06	1.04864e+07	9.08178e+06	4.6914e+06	188007	9.08349e+06	0.00197377	1.08692	48.3145	5.59439
94	N-Acetylsphingosine	C20 H39 N O3	363.276	7.264	39521.9	37075.5	39303.6	36700.4	38134.7	183563	89593.9	225199	165219	245185	38147.2	181752	0.00607553	1.04831	4.76449	2.25232
95	Corticosterone	C21 H30 O4	346.213	7.85	37249.6	36911.2	38991.2	34896	37166	5.22227e+06	1.10063e+07	2.92764e+06	7.56792e+06	6.42278e+06	37042.8	6.62938e+06	0.00787371	1.0117	178.965	7.48354
96	(+/-)9-HpODE	C18 H32 O4	312.229	14.192	54653.9	38275.4	35955.9	57576.8	54905.2	8.38521e+06	8.70295e+06	8.80369e+06	9.56922e+06	1.09464e+07	48273.4	9.28149e+06	3.61229e-05	1.16737	192.269	7.58698
97	2-(8-Hydroxy-4a,8-dimethyldecahydro-2-naphthalenyl)acrylic acid	C15 H24 O3	234.161	14.719	5.85133e+06	7.15189e+06	6.88131e+06	5.62935e+06	5.56902e+06	1.33647e+07	1.40422e+07	1.62844e+07	1.54451e+07	1.24524e+07	6.21658e+06	1.43178e+07	5.6296e-05	1.13338	2.30316	1.20361
98	N-({(2R,3S,4R,5S)-3,4-Dihydroxy-5-[2-(isopropylamino)-2-oxoethyl]tetrahydro-2-furanyl}methyl)cyclopropanecarboxamide	C14 H24 N2 O5	336.142	6.217	45270.8	45807.2	43905.3	47723.8	48852.8	1.91573e+06	5.17396e+06	4.30585e+06	3.52676e+06	3.12099e+06	46312	3.60866e+06	0.00292535	1.06419	77.9205	6.28393
99	(+/-)9,10-dihydroxy-12Z-octadecenoic acid	C18 H34 O4	314.245	12.115	36291.1	33400.2	35754.8	65163.6	34652.4	9.16885e+06	8.21e+06	6.9945e+06	4.98804e+06	3.99978e+06	41052.4	6.67223e+06	0.00236196	1.06936	162.53	7.34456
100	Prostaglandin F2?	C20 H34 O5	354.24	8.948	30196.1	28867.3	29555.3	33290.8	30786.2	2.09713e+07	8.4568e+06	1.5987e+07	2.17155e+07	1.02329e+07	30539.1	1.54727e+07	0.00464466	1.06858	506.652	8.98485
101	7-(4-methoxyphenyl)-10-methyl-7,9-dihydro-6H,8H-chromeno[3',4':5,6]pyrano[2,3-d]pyrimidine-6,8-dione	C22 H16 N2 O5	388.109	8.062	26837.3	25661.3	26101.8	28832	28701.8	8.44196e+06	9.05137e+06	3.96609e+06	1.01882e+07	2.81782e+06	27226.8	6.89309e+06	0.0094648	1.00733	253.173	7.98398
102	Arachidonoyl amide	C20 H33 N O	303.255	19.468	88440.1	85329.9	89000.1	74207.6	83137.5	4.11792e+06	2.5589e+06	2.37957e+06	5.57515e+06	2.94435e+06	84023	3.51518e+06	0.00455259	1.07498	41.8359	5.38667
103	1-Tetradecylamine	C14 H31 N	213.245	11.028	1.24336e+06	1.67104e+06	1.27738e+06	1.99268e+06	1.98349e+06	7.12498e+06	7.14864e+06	1.13015e+07	1.02253e+07	7.89158e+06	1.63359e+06	8.7384e+06	0.000905214	1.11774	5.3492	2.41932
104	Tanespimycin	C31 H43 N3 O8	567.283	9.197	33187.2	33207.1	30715.8	35419.1	33275.8	1.03108e+07	5.45739e+06	1.33355e+07	8.38578e+06	1.33395e+07	33161	1.01658e+07	0.00255417	1.08863	306.559	8.26002
105	Dioxohongdenafil	C25 H30 N6 O5	494.229	6.813	41014.6	36184.3	36905.5	37841	38411	3.46844e+06	2.06879e+06	5.35083e+06	2.33866e+06	4.74504e+06	38071.3	3.59435e+06	0.00529083	1.04462	94.4111	6.56088
106	NP-011548	C18 H34 O3	298.25	22.627	55990.5	140857	154872	106150	71638.5	7.02881e+06	8.04557e+06	7.96904e+06	7.94909e+06	3.984e+06	105902	6.9953e+06	0.00088342	1.11405	66.0546	6.04559
107	NP-018545	C17 H24 O4	292.167	10.466	27888	28461.5	27383	28342.9	29306.8	7.15624e+06	2.88788e+06	1.0389e+07	9.49821e+06	4.52888e+06	28276.4	6.89204e+06	0.00857907	1.0275	243.738	7.92919
108	(5ξ,9ξ)-17-Hydroxykaur-15-en-19-oic acid	C20 H30 O3	364.224	9.028	26776.8	26115.6	24662.8	29521	27705.6	3.76551e+06	2.56275e+06	4.74601e+06	4.08023e+06	5.11392e+06	26956.4	4.05369e+06	0.000806322	1.13139	150.38	7.23246
109	5-[(1S,2R,4aR)-5-(Hydroxymethyl)-1,2,4a-trimethyl-1,2,3,4,4a,7,8,8a-octahydro-1-naphthalenyl]-3-methylpentanoic acid	C20 H34 O3	322.25	16.463	54124.7	52633.4	54825.5	57285.8	55492.2	4.34372e+06	2.85374e+06	3.95749e+06	5.16023e+06	1.35553e+06	54872.3	3.53414e+06	0.00617485	1.04436	64.4067	6.00914
110	N-Acetyl-DL-tryptophan	C13 H14 N2 O3	246.099	7.32	35567.3	33923.7	35962.4	34542.9	33194.7	8.88069e+06	1.03589e+07	4.88e+06	1.20299e+07	8.07777e+06	34638.2	8.84546e+06	0.00182562	1.10373	255.367	7.99643
111	Decanoylcarnitine	C17 H33 N O4	315.24	9.704	38955.6	37978.9	39222.1	37038.7	39412.8	5.98664e+06	5.92505e+06	5.08849e+06	5.45796e+06	3.81646e+06	38521.6	5.25492e+06	0.000190192	1.14361	136.415	7.09186
112	2,5-di-tert-Butylhydroquinone	C14 H22 O2	222.161	11.044	351642	240929	327731	398629	319074	556918	566813	498886	737888	677355	327601	607572	0.00112666	1.06825	1.85461	0.891116
113	Cortisone	C21 H28 O5	360.192	8.212	39506.8	37873.4	38712.5	38924.4	36690.3	4.30659e+06	1.16519e+07	7.26549e+06	6.79937e+06	1.16513e+07	38341.5	8.33493e+06	0.00455357	1.04515	217.387	7.76412
114	Pipenzolate	C22 H27 N O3	353.201	11.795	39836.6	43308.2	40743	37506.9	36208.4	103014	107066	170358	160908	87556.9	39520.6	125781	0.0064831	1.03747	3.18266	1.67023
115	Docosahexaenoic acid methyl ester	C23 H34 O2	348.265	17.501	130493	94335	272638	265377	114362	2.83563e+06	2.53821e+06	1.92686e+06	2.96229e+06	1.51941e+06	175441	2.35648e+06	0.00121223	1.10775	13.4318	3.74758
116	Dodecanedioic acid	C12 H22 O4	230.151	9.578	220592	200679	239159	274649	204634	8.12629e+06	5.22599e+06	9.04851e+06	4.46828e+06	9.22616e+06	227943	7.21905e+06	0.0021465	1.08618	31.6705	4.98507
117	N-[3-(2,6-dimethylmorpholino)propyl]-2,3,4,5,6-pentamethylbenzenesulfonamide	C20 H34 N2 O3 S	382.235	6.648	26709.5	26174.3	25279.2	28605.4	28306.6	8.97549e+06	7.81899e+06	1.05494e+07	5.48252e+06	1.05947e+07	27015	8.68423e+06	0.000818415	1.11381	321.459	8.32849
118	2-Thio-acetyl MAGE	C21 H42 O3 S	356.27	12.19	33135.6	35005.3	37407.9	30457.2	33303.1	3.92463e+06	2.24461e+06	3.77223e+06	5.072e+06	2.37129e+06	33861.8	3.47696e+06	0.00285292	1.09354	102.681	6.68202
